# Supplementary material for: Acylation of indoles via photoredox catalysis: a route to 3-acylindoles
Source: Royal Society of Chemistry journal article supplement (doi:10.1039/c5gc01931a), 2015-11-16
Supplement: c5gc01931a1.pdf [file c5gc01931a1.pdf]

## Acylation of indoles via photoredox catalysis: A route to 3-acylindoles

Lijun Gu, <sup>\*a,b</sup> Cheng Jin, <sup>c</sup> Jiyan Liu, <sup>a</sup> Hongtao Zhang, <sup>a</sup> Minglong Yuan <sup>\*b</sup> and Ganpeng Li <sup>a</sup>

<sup>a</sup> Key Laboratory of Chemistry in Ethnic Medicinal Resources, State Ethnic Affairs Commission & Ministry of Education, Yunnan Minzu University, Kunming 650500, China, <sup>b</sup> Engineering Research Center of Biopolymer Functional Materials of Yunnan, Yunnan Minzu University, Kunming, Yunnan, 650500, China and <sup>c</sup> New United Group Company Limited, Changzhou, Jiangsu, 213166, China.

Email: gulijun2005@126.com; yml@vip.163.com

### Supporting Information

#### List of Contents

- (A) Materials and equipment
- (B) Typical experimental procedure
- (C) Analytical data
- (D) Spectra

#### (A) Materials and equipment

Reagents were obtained commercially and used as received. Solvents were purified and dried by standard methods. All title products were characterized by Infrared (IR), MS,  $^1\text{H}$  NMR,  $^{13}\text{C}$  NMR and High Resolution mass spectrometer (HRMS). IR spectra were reported in frequency of the absorption ( $\text{cm}^{-1}$ ).  $^1\text{H}$  NMR spectra were recorded on 400 MHz in  $\text{CDCl}_3$  or  $\text{DMSO-}d_6$ , and  $^{13}\text{C}$  NMR spectra were recorded on 100 MHz in  $\text{CDCl}_3$  or  $\text{DMSO-}d_6$  using tetramethylsilane (TMS) as an internal standard. Chemical shift values ( $\delta$ ) are given in ppm. Coupling constants ( $J$ ) were measured in Hz. Mass spectra were obtained with ionization voltages of 70 eV. HRMS spectra were obtained by ESI on a TOF mass. 200-300 mesh silica gel was used for column chromatography.

## (B) Typical experimental procedure

### Typical Experimental Procedure for the Synthesis of compounds 3:

To a Schlenk tube were added  $\alpha$ -oxo acids **1** (0.3 mmol), indoles **2** (0.3 mmol), **PC1** (3 mol%), DMF (2.0 mL), dtbbpy (15 mol%),  $\text{NiCl}_2\cdot\text{glyme}$  (10 mol%),  $\text{I}_2$  (0.3 mmol),  $\text{Cs}_2\text{CO}_3$  (0.6 mmol), LiF (0.3 mmol). Then the tube was charged with argon, and was stirred at room temperature with the irradiation of a 35 W blue LED for about 60 h. After the reaction was finished, the reaction mixture was diluted in 35 mL ethyl acetate, washed with a saturated solution of brine (8 mL  $\times 2$ ), a solution of  $\text{Na}_2\text{S}_2\text{O}_3$  (8 mL), a saturated solution of brine (8 mL  $\times 2$ ), saturated  $\text{NaHCO}_3$  (10 mL), a saturated solution of brine (8 mL), dried ( $\text{Na}_2\text{SO}_4$ ) and concentrated in vacuum, and the resulting residue was purified by silica gel column chromatography (hexane/ethyl acetate) to afford the desired products **3**.

## (C) Analytical data

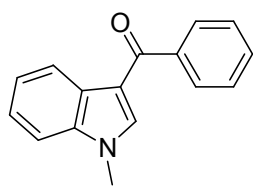

### (1-Methyl-1H-indol-3-yl)(phenyl)methanone (3aa):

$^1\text{H}$  NMR (400 MHz,  $\text{CDCl}_3$ )  $\delta$ : 8.37-8.34 (m, 1H), 7.73 (d,  $J = 6.8$  Hz, 2H), 7.73-7.38 (m, 4H), 7.29 (dd,  $J = 3.6$  Hz,  $J = 4.0$  Hz, 3H), 3.78 (s, 3H);  $^{13}\text{C}$  NMR (100 MHz,  $\text{CDCl}_3$ )  $\delta$ : 190.9, 140.9, 137.9, 137.5, 131.1, 128.6, 128.3, 127.1, 123.6, 122.74, 122.73, 115.5, 109.6, 33.6, IR (neat  $\text{cm}^{-1}$ ): 1657 (C=O); LRMS (EI 70 eV)  $m/z$  (%): 235 ( $\text{M}^+$ , 100); HRMS  $m/z$  (ESI) calcd for  $\text{C}_{16}\text{H}_{13}\text{NNaO}$  ( $\text{M}+\text{Na}$ ) $^+$  258.0889, found 258.0897.

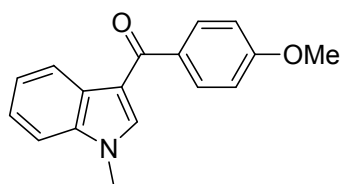

**3ab**

**(4-Methoxyphenyl)(1-methyl-1H-indol-3-yl)methanone (3ab):**

$^1\text{H}$  NMR (400 MHz,  $\text{CDCl}_3$ )  $\delta$ : 8.31 (d,  $J = 7.6$  Hz, 1H), 7.77 (d,  $J = 8.4$  Hz, 2H), 7.47 (s, 1H), 7.31-7.23 (m, 3H), 6.92 (d,  $J = 8.4$  Hz, 2H), 3.81 (s, 3H), 3.78 (s, 3H);  $^{13}\text{C}$  NMR (100 MHz,  $\text{CDCl}_3$ )  $\delta$ : 189.7, 162.1, 137.4, 137.0, 133.4, 130.8, 127.3, 123.4, 122.6, 122.4, 115.6, 113.4, 109.5, 55.4, 33.5; IR (neat  $\text{cm}^{-1}$ ): 1643 (C=O); LRMS (EI 70 ev)  $m/z$  (%): 265 ( $\text{M}^+$ , 100); HRMS  $m/z$  (ESI) calcd for  $\text{C}_{17}\text{H}_{15}\text{NNaO}_2$  ( $\text{M}+\text{Na}$ ) $^+$  288.0994, found 288.1002.

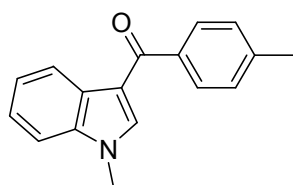

**3ac**

**(1-Methyl-1H-indol-3-yl)(p-tolyl)methanone (3ac):**

$^1\text{H}$  NMR (400 MHz,  $\text{CDCl}_3$ )  $\delta$ : 8.43-8.41 (m, 1H), 7.76 (d,  $J = 8.0$  Hz, 2H), 7.50 (s, 1H), 7.37-7.34 (m, 3H), 7.30 (d,  $J = 7.2$  Hz, 2H), 3.80 (s, 3H), 2.43 (s, 3H);  $^{13}\text{C}$  NMR (100 MHz,  $\text{CDCl}_3$ )  $\delta$ : 190.5, 141.4, 138.0, 137.5, 137.2, 128.7, 128.5, 127.1, 123.6, 122.6, 122.4, 115.5, 109.6, 33.2, 21.3; IR (neat  $\text{cm}^{-1}$ ): 1649 (C=O); LRMS (EI 70 ev)  $m/z$  (%): 249 ( $\text{M}^+$ , 100); HRMS  $m/z$  (ESI) calcd for  $\text{C}_{17}\text{H}_{15}\text{NNaO}$  ( $\text{M}+\text{Na}$ ) $^+$  272.1046, found 272.1041.

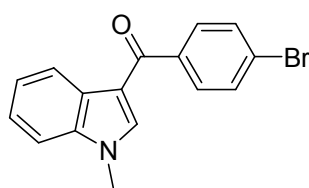

**3ad**

**(4-Bromophenyl)(1-methyl-1H-indol-3-yl)methanone (3ad):**

$^1\text{H}$  NMR (400 MHz,  $\text{CDCl}_3$ )  $\delta$ : 8.40 (d,  $J = 5.2$  Hz, 1H), 7.68 (d,  $J = 8.0$  Hz, 2H), 7.61 (d,  $J = 8.0$  Hz, 2H), 7.48 (s, 1H), 7.35 (s, 3H), 3.82 (s, 3H);  $^{13}\text{C}$  NMR (100 MHz,  $\text{CDCl}_3$ )  $\delta$ : 189.3, 139.5, 137.6, 137.4, 131.4, 130.1, 126.9, 125.6, 123.7, 122.7, 122.5, 115.2, 109.6, 33.5; IR (neat  $\text{cm}^{-1}$ ): 1663 (C=O); LRMS (EI 70 ev)  $m/z$  (%): 313 ( $\text{M}^+$ , 71); HRMS  $m/z$  (ESI) calcd for  $\text{C}_{16}\text{H}_{12}\text{BrNNaO}$  ( $\text{M}+\text{Na}$ ) $^+$  335.9994, found 336.0001.

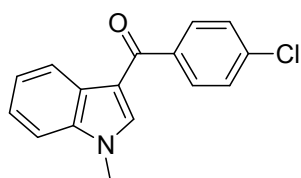

**3ae**

**(4-Chlorophenyl)(1-methyl-1H-indol-3-yl)methanone (3ae):**

$^1\text{H}$  NMR (400 MHz,  $\text{CDCl}_3$ )  $\delta$ : 8.39-8.36 (m, 1H), 7.74 (d,  $J = 8.4$  Hz, 2H), 7.49 (s, 1H), 7.45 (d,  $J = 8.4$  Hz, 2H), 7.35-7.32 (m, 3H), 3.86 (s, 3H); IR (neat  $\text{cm}^{-1}$ ): 1664 (C=O); LRMS (EI 70 eV)  $m/z$  (%): 269 ( $\text{M}^+$ , 100); HRMS  $m/z$  (ESI) calcd for  $\text{C}_{16}\text{H}_{12}\text{ClNNaO}$  ( $\text{M}+\text{Na}$ ) $^+$  292.0500, found 292.0504.

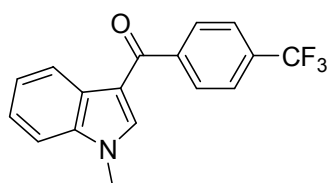

**3af**

**(4-(Trifluoromethyl)phenyl)(1-methyl-1H-indol-3-yl)methanone (3af):**

$^1\text{H}$  NMR (400 MHz,  $\text{CDCl}_3$ )  $\delta$ : 8.42 (d,  $J = 5.6$  Hz, 1H), 7.90 (d,  $J = 8.0$  Hz, 2H), 7.76 (d,  $J = 8.0$  Hz, 2H), 7.49 (s, 1H), 7.39 (d,  $J = 8.0$  Hz, 3H), 3.86 (s, 3H);  $^{13}\text{C}$  NMR (100 MHz,  $\text{CDCl}_3$ )  $\delta$ : 189.4, 144.0, 138.0, 137.6, 129.8, 129.7, 128.8, 128.55, 128.52, 126.9, 126.89, 126.86, 125.37, 125.33, 124.0, 123.1, 122.7, 115.4, 109.7, 33.6; IR (neat  $\text{cm}^{-1}$ ): 1666 (C=O); LRMS (EI 70 eV)  $m/z$  (%): 303 ( $\text{M}^+$ , 100); HRMS  $m/z$  (ESI) calcd for  $\text{C}_{17}\text{H}_{12}\text{F}_3\text{NNaO}$  ( $\text{M}+\text{Na}$ ) $^+$  326.0763, found 326.0771.

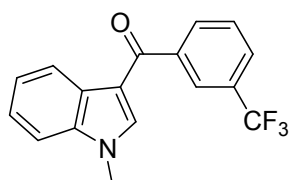

**3ag**

**(3-(Trifluoromethyl)phenyl)(1-methyl-1H-indol-3-yl)methanone (3ag):**

$^1\text{H}$  NMR (400 MHz,  $\text{CDCl}_3$ )  $\delta$ : 8.37 (d,  $J = 6.8$  Hz, 1H), 8.07 (s, 1H), 7.99 (d,  $J = 7.2$  Hz, 1H), 7.81 (d,  $J = 7.6$  Hz, 1H), 7.64 (t,  $J = 7.6$  Hz, 1H), 7.49 (s, 1H), 7.38 (s, 3H), 3.87 (s, 3H);  $^{13}\text{C}$  NMR (100 MHz,  $\text{CDCl}_3$ )  $\delta$ : 189.0, 137.7, 137.6, 131.7, 130.6, 128.9, 127.5, 127.0, 125.4, 125.3, 123.9, 123.0, 122.6, 122.5, 115.2, 109.7, 33.6; IR (neat  $\text{cm}^{-1}$ ): 1654 (C=O); LRMS (EI 70 eV)  $m/z$  (%): 303 ( $\text{M}^+$ , 100); HRMS  $m/z$  (ESI) calcd for  $\text{C}_{17}\text{H}_{12}\text{F}_3\text{NNaO}$  ( $\text{M}+\text{Na}$ ) $^+$  326.0763, found 326.0769.

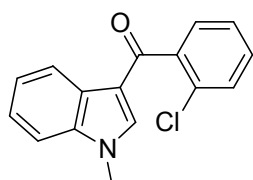

**3ah**

**(2-Chlorophenyl)(1-methyl-1H-indol-3-yl)methanone (3ah):**

$^1\text{H}$  NMR (400 MHz,  $\text{CDCl}_3$ )  $\delta$ : 8.37 (d,  $J = 5.6$  Hz, 1H), 7.48-7.42 (m, 3H), 7.40-7.36 (m, 4H), 7.34-7.30 (m, 1H), 3.80 (s, 3H);  $^{13}\text{C}$  NMR (100 MHz,  $\text{CDCl}_3$ )  $\delta$ : 188.7, 140.5, 138.8, 137.7, 130.9, 130.2, 130.0, 128.6, 126.44, 126.41, 123.8, 123.0, 122.6, 116.4, 109.7, 33.6; IR (neat  $\text{cm}^{-1}$ ): 1649 (C=O); LRMS (EI 70 ev)  $m/z$  (%): 269 ( $\text{M}^+$ , 100); HRMS  $m/z$  (ESI) calcd for  $\text{C}_{16}\text{H}_{12}\text{ClNNaO}$  ( $\text{M}+\text{Na}$ ) $^+$  292.0500, found 292.0508.

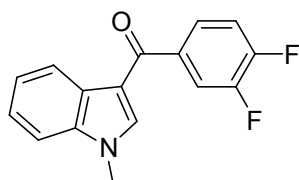

**3ai**

**(3,4-Difluorophenyl)(1-methyl-1H-indol-3-yl)methanone (3ai):**

$^1\text{H}$  NMR (400 MHz,  $\text{CDCl}_3$ )  $\delta$ : 8.29 (d,  $J = 7.2$  Hz, 1H), 7.58 (d,  $J = 9.2$  Hz, 1H), 7.48 (s, 1H), 7.42 (s, 1H), 7.28 (s, 3H), 7.19 (dd,  $J = 10.0$  Hz,  $J = 8.4$  Hz, 1H), 3.77 (s, 3H);  $^{13}\text{C}$  NMR (100 MHz,  $\text{CDCl}_3$ )  $\delta$ : 187.7; 153.5, 153.4, 151.3, 151.2, 151.0, 150.9, 148.8, 148.7, 137.7, 137.66, 137.62, 137.5, 126.9, 125.3, 125.26, 125.23, 125.1, 123.8, 122.8, 122.5, 118.0, 117.8, 117.2, 117.0, 114.9, 109.7, 33.5; IR (neat  $\text{cm}^{-1}$ ): 1649 (C=O); LRMS (EI 70 ev)  $m/z$  (%): 271 ( $\text{M}^+$ , 100); HRMS  $m/z$  (ESI) calcd for  $\text{C}_{16}\text{H}_{11}\text{F}_2\text{NNaO}$  ( $\text{M}+\text{Na}$ ) $^+$  294.0701, found 294.0708.

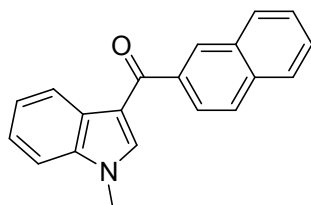

**3aj**

**(1-Methyl-1H-indol-3-yl)(naphthalen-3-yl)methanone (3aj):**

$^1\text{H}$  NMR (400 MHz,  $\text{CDCl}_3$ )  $\delta$ : 8.42 (s, 1H), 8.21 (s, 1H), 7.87-7.84 (m, 4H), 7.51-7.47 (s, 3H), 7.30 (s, 3H), 3.74 (s, 3H);  $^{13}\text{C}$  NMR (100 MHz,  $\text{CDCl}_3$ )  $\delta$ : 190.5, 138.0, 137.9, 137.2, 134.6, 132.4, 129.1, 128.8, 128.1, 127.6, 127.0, 126.4, 125.4, 123.6, 122.5, 122.4, 115.5, 109.6, 33.5; IR (neat  $\text{cm}^{-1}$ ): 1650 (C=O); LRMS (EI 70 ev)  $m/z$  (%): 241 ( $\text{M}^+$ , 100); HRMS  $m/z$  (ESI) calcd for  $\text{C}_{20}\text{H}_{15}\text{NNaO}$  ( $\text{M}+\text{Na}$ ) $^+$  308.1046, found 308.1050.

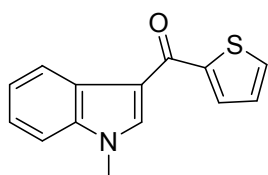

**3ak**

**(1-Methyl-1H-indol-3-yl)(thiophen-2-yl)methanone (3ak):**

$^1\text{H}$  NMR (400 MHz,  $\text{CDCl}_3$ )  $\delta$ : 8.43-8.41 (m, 1H), 7.77 (s, 1H), 7.71 (d,  $J = 3.6$  Hz, 1H), 7.57 (d,  $J = 4.4$  Hz, 1H), 7.32 (s, 3H), 7.15 (t,  $J = 4.0$  Hz, 1H), 3.84 (s, 3H);  $^{13}\text{C}$  NMR (100 MHz,  $\text{CDCl}_3$ )  $\delta$ : 181.5, 145.1, 137.3, 136.1, 131.2, 130.7, 127.5, 127.0, 123.4, 122.2, 120.1, 115.1, 109.8, 33.2; IR (neat  $\text{cm}^{-1}$ ): 1638 (C=O); LRMS (EI 70 eV)  $m/z$  (%): 263 ( $\text{M}^+$ , 100); HRMS  $m/z$  (ESI) calcd for  $\text{C}_{14}\text{H}_{11}\text{NNaOS}$  ( $\text{M}+\text{Na}$ ) $^+$  264.0453, found 264.0459.

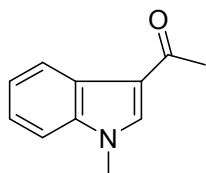

**3al**

**1-(1-Methyl-1H-indol-3-yl)ethanone (3al):**

$^1\text{H}$  NMR (400 MHz,  $\text{CDCl}_3$ )  $\delta$ : 8.38 (dd,  $J = 8.0$  Hz,  $J = 2.4$  Hz, 1H), 7.63 (s, 1H), 7.31-7.27 (m, 3H), 3.77 (s, 3H), 2.45 (s, 3H);  $^{13}\text{C}$  NMR (100 MHz,  $\text{CDCl}_3$ )  $\delta$ : 192.9, 137.0, 135.5, 125.9, 123.2, 122.6, 122.1, 116.5, 109.6, 33.4, 27.2. IR (neat  $\text{cm}^{-1}$ ): 1647 (C=O); LRMS (EI 70 eV)  $m/z$  (%): 173 ( $\text{M}^+$ , 100); HRMS  $m/z$  (ESI) calcd for  $\text{C}_{11}\text{H}_{11}\text{NNaO}$  ( $\text{M}+\text{Na}$ ) $^+$  196.0734, found 196.0730.

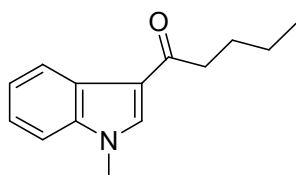

**3am**

**1-(1-Methyl-1H-indol-3-yl)pentan-1-one (3am):**

$^1\text{H}$  NMR (400 MHz,  $\text{CDCl}_3$ )  $\delta$ : 8.43 (d,  $J = 5.2$  Hz, 1H), 7.66 (s, 1H), 7.17 (d,  $J = 8.4$  Hz, 3H), 3.77 (s, 3H), 2.83 (dd,  $J = 1.6$  Hz,  $J = 6.8$  Hz, 2H), 1.80-1.73 (m, 2H), 1.46-1.41 (m, 2H), 0.99 (t,  $J = 7.4$  Hz, 3H);  $^{13}\text{C}$  NMR (100 MHz,  $\text{CDCl}_3$ )  $\delta$ : 195.8, 137.2, 135.1, 126.1, 123.0, 122.3, 122.2, 116.3, 109.4, 39.4, 33.2, 27.2, 22.5, 13.8; IR (neat  $\text{cm}^{-1}$ ): 1651 (C=O); LRMS (EI 70 eV)  $m/z$  (%): 215 ( $\text{M}^+$ , 100); HRMS  $m/z$  (ESI) calcd for  $\text{C}_{14}\text{H}_{17}\text{NNaO}$  ( $\text{M}+\text{Na}$ ) $^+$  238.1205, found 238.1212.

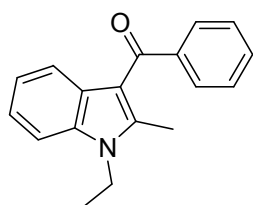

**3ba**

**(1-Ethyl-2-methyl-1H-indol-3-yl)(phenyl)methanone (3ba):**

$^1\text{H}$  NMR (400 MHz,  $\text{CDCl}_3$ )  $\delta$ : 7.78 (d,  $J = 7.6$  Hz, 2H), 7.57 (t,  $J = 7.4$  Hz, 1H), 7.47 (t,  $J = 7.6$  Hz, 2H), 7.35 (dd,  $J = 8.4$  Hz,  $J = 8.4$  Hz, 2H), 7.23 (t,  $J = 7.6$  Hz, 1H), 7.09 (t,  $J = 7.6$  Hz, 1H), 4.24 (q,  $J = 7.2$  Hz, 2H), 2.61 (s, 3H), 1.43 (t,  $J = 7.4$  Hz, 3H);  $^{13}\text{C}$  NMR (100 MHz,  $\text{CDCl}_3$ )  $\delta$ : 192.8, 143.8, 141.4, 135.3, 131.3, 128.9, 128.1, 127.2, 121.9, 121.2, 120.9, 113.6, 109.1, 37.9, 14.7, 12.1; IR (neat  $\text{cm}^{-1}$ ): 1662 (C=O); LRMS (EI 70 ev)  $m/z$  (%): 263 ( $\text{M}^+$ , 100); HRMS  $m/z$  (ESI) calcd for  $\text{C}_{18}\text{H}_{17}\text{NNaO}$  ( $\text{M}+\text{Na}$ ) $^+$  286.1203, found 286.1210.

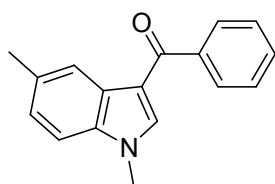

**3ca**

**(1,5-Dimethyl-1H-indol-3-yl)(phenyl)methanone (3ca):**

$^1\text{H}$  NMR (400 MHz,  $\text{CDCl}_3$ )  $\delta$ : 8.23 (s, 1H), 7.77 (d,  $J = 6.4$  Hz, 2H), 7.51 (d,  $J = 7.6$  Hz, 1H), 7.43 (t,  $J = 6.4$  Hz, 3H), 7.24-7.18 (m, 2H), 3.77 (s, 3H), 2.49 (s, 3H);  $^{13}\text{C}$  NMR (100 MHz,  $\text{CDCl}_3$ )  $\delta$ : 190.4, 140.3, 138.1, 135.7, 132.2, 130.6, 128.4, 128.0, 127.2, 125.2, 122.2, 114.5, 109.0, 33.1, 21.2; IR (neat  $\text{cm}^{-1}$ ): 1649 (C=O); LRMS (EI 70 ev)  $m/z$  (%): 249 ( $\text{M}^+$ , 100); HRMS  $m/z$  (ESI) calcd for  $\text{C}_{17}\text{H}_{15}\text{NNaO}$  ( $\text{M}+\text{Na}$ ) $^+$  272.1046, found 272.1053.

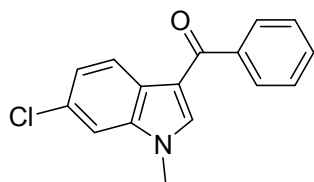

**3da**

**(6-Chloro-1-methyl-1H-indol-3-yl)(phenyl)methanone (3da):**

$^1\text{H}$  NMR (400 MHz,  $\text{CDCl}_3$ )  $\delta$ : 8.33 (d,  $J = 8.4$  Hz, 1H), 7.79 (d,  $J = 7.2$  Hz, 2H), 7.53 (d,  $J = 6.8$  Hz, 1H), 7.47 (s, 3H), 7.31-7.27 (m, 2H), 3.78 (s, 3H);  $^{13}\text{C}$  NMR (100 MHz,  $\text{CDCl}_3$ )  $\delta$ : 190.4, 140.2, 138.0, 137.8, 131.2, 129.3, 128.5, 128.1, 125.4, 123.5, 123.1, 115.2, 109.6, 33.2; IR (neat  $\text{cm}^{-1}$ ): 1671 (C=O); LRMS (EI 70 ev)  $m/z$  (%): 269 ( $\text{M}^+$ , 71); HRMS  $m/z$  (ESI) calcd for  $\text{C}_{16}\text{H}_{12}\text{ClNNaO}$  ( $\text{M}+\text{Na}$ ) $^+$  292.0500, found 292.0494.

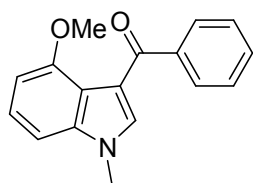

**3ea**

**(4-Methoxy-1-methyl-1H-indol-3-yl)(phenyl)methanone (3ea):**

$^1\text{H}$  NMR (400 MHz,  $\text{CDCl}_3$ )  $\delta$ : 7.79 (d,  $J = 7.6$  Hz, 2H), 7.47 (t,  $J = 7.4$  Hz, 1H), 7.31-7.26 (m,

3H), 7.12 (t,  $J = 7.6$  Hz, 1H), 6.81 (d,  $J = 8.0$  Hz, 1H), 6.63 (d,  $J = 8.0$  Hz, 1H), 3.72 (s, 3H), 3.63 (s, 3H);  $^{13}\text{C}$  NMR (100 MHz,  $\text{CDCl}_3$ )  $\delta$ : 191.0, 154.3, 140.7, 139.1, 135.4, 131.3, 129.7, 127.4, 124.4, 116.6, 116.5, 102.8, 102.1, 55.4, 33.5; IR (neat  $\text{cm}^{-1}$ ): 1649 (C=O); LRMS (EI 70 ev)  $m/z$  (%): 265 ( $\text{M}^+$ , 100); HRMS  $m/z$  (ESI) calcd for  $\text{C}_{17}\text{H}_{15}\text{NNaO}_2$  ( $\text{M}+\text{Na}$ ) $^+$  288.0994, found 288.0999.

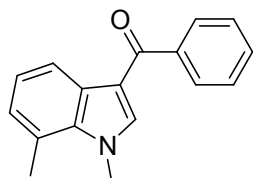

**3fa**

**(1,7-Dimethyl-1H-indol-3-yl)(phenyl)methanone (3fa):**

$^1\text{H}$  NMR (400 MHz,  $\text{CDCl}_3$ )  $\delta$ : 7.79 (d,  $J = 7.2$  Hz, 1H), 7.76 (d,  $J = 7.6$  Hz, 2H), 7.55-7.51 (m, 1H), 7.45 (t,  $J = 7.2$  Hz, 2H), 7.33 (s, 1H), 7.19 (t,  $J = 7.2$  Hz, 1H), 7.03 (d,  $J = 7.2$  Hz, 1H); 4.03 (s, 3H), 2.74 (s, 3H);  $^{13}\text{C}$  NMR (100 MHz,  $\text{CDCl}_3$ )  $\delta$ : 190.5, 140.7, 139.4, 136.2, 130.8, 128.6, 128.2, 128.0, 126.4, 122.7, 121.5, 120.6, 115.1, 37.5, 19.4; IR (neat  $\text{cm}^{-1}$ ): 1667 (C=O); LRMS (EI 70 ev)  $m/z$  (%): 249 ( $\text{M}^+$ , 100); HRMS  $m/z$  (ESI) calcd for  $\text{C}_{17}\text{H}_{15}\text{NNaO}$  ( $\text{M}+\text{Na}$ ) $^+$  272.1046, found 272.1055.

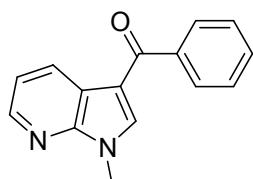

**3ga**

**(1-Methyl-1H-pyrrolo[2,3-b]pyridin-3-yl)(phenyl)methanone (3ga):**

$^1\text{H}$  NMR (400 MHz,  $\text{CDCl}_3$ )  $\delta$ : 8.65 (d,  $J = 7.6$  Hz, 1H), 8.44 (dd,  $J = 4.8$  Hz,  $J = 0.4$  Hz, 1H), 7.79 (d,  $J = 7.2$  Hz, 2H), 7.67 (s, 1H), 7.56-7.53 (m, 1H), 7.48 (t,  $J = 7.6$  Hz, 2H), 7.29-7.26 (m, 1H), 3.92 (s, 3H);  $^{13}\text{C}$  NMR (100 MHz,  $\text{CDCl}_3$ )  $\delta$ : 190.3, 148.0, 144.3, 139.7, 137.2, 131.4, 131.0, 128.6, 128.3, 119.4, 118.2, 113.6, 32.0; IR (neat  $\text{cm}^{-1}$ ): 1641 (C=O); LRMS (EI 70 ev)  $m/z$  (%): 236 ( $\text{M}^+$ , 100); HRMS  $m/z$  (ESI) calcd for  $\text{C}_{15}\text{H}_{12}\text{N}_2\text{NaO}$  ( $\text{M}+\text{Na}$ ) $^+$  259.0842, found 259.0851.

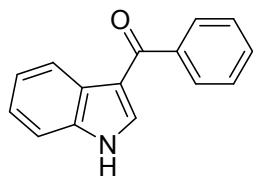

**3ha**

**(1H-indol-3-yl)(phenyl)methanone (3ha):**

$^1\text{H}$  NMR (400 MHz,  $\text{DMSO}-d_6$ )  $\delta$ : 12.06 (brs, 1H), 8.26 (t,  $J = 5.8$  Hz, 1H), 7.91 (s, 1H), 7.78 (d,  $J = 7.2$  Hz, 2H), 7.62-7.52 (m, 4H), 7.29 (dd,  $J = 6.0$  Hz,  $J = 6.4$  Hz, 2H);  $^{13}\text{C}$  NMR (100 MHz,  $\text{DMSO}-d_6$ )  $\delta$ : 190.6, 140.8, 137.1, 136.3, 131.6, 128.9, 128.8, 126.6, 123.8, 122.5, 121.9, 115.4, 112.8;



IR (neat  $\text{cm}^{-1}$ ): 1648 (C=O); LRMS (EI 70 ev)  $m/z$  (%): 221 ( $\text{M}^+$ , 100); HRMS  $m/z$  (ESI) calcd for  $\text{C}_{15}\text{H}_{11}\text{NNaO}$  ( $\text{M}+\text{Na}$ ) $^+$  244.0733, found 244.0740.

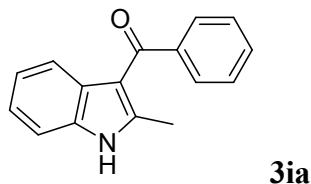

**(2-Methyl-1H-indol-3-yl)(phenyl)methanone (3ia):**

$^1\text{H}$  NMR (400 MHz,  $\text{DMSO-}d_6$ )  $\delta$ : 11.96 (brs, 1H), 7.60 (t,  $J = 7.2$  Hz, 3H), 7.52 (t,  $J = 7.4$  Hz, 2H), 7.40 (d,  $J = 8.0$  Hz, 1H), 7.33 (d,  $J = 8.0$  Hz, 1H), 7.13 (t,  $J = 7.6$  Hz, 1H), 7.02 (t,  $J = 7.6$  Hz, 1H); 2.37 (s, 3H);  $^{13}\text{C}$  NMR (100 MHz,  $\text{DMSO-}d_6$ )  $\delta$ : 192.3, 145.0, 142.0, 135.4, 131.5, 128.8, 128.4, 127.7, 122.3, 121.4, 120.4, 112.9, 111.7, 14.6; IR (neat  $\text{cm}^{-1}$ ): 1640 (C=O); LRMS (EI 70 ev)  $m/z$  (%): 235 ( $\text{M}^+$ , 100); HRMS  $m/z$  (ESI) calcd for  $\text{C}_{16}\text{H}_{13}\text{NNaO}$  ( $\text{M}+\text{Na}$ ) $^+$  258.0889, found 258.0881.

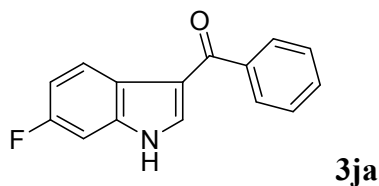

**(6-Fluoro-1H-indol-3-yl)(phenyl)methanone (3ja):**

$^1\text{H}$  NMR (400 MHz,  $\text{DMSO-}d_6$ )  $\delta$ : 12.10 (brs, 1H), 8.25 (t,  $J = 7.2$  Hz, 1H), 7.93 (s, 1H), 7.91 (d,  $J = 7.2$  Hz, 2H), 7.61-7.52 (m, 3H), 7.33 (d,  $J = 6.0$  Hz, 1H), 7.13 (t,  $J = 9.4$  Hz, 1H);  $^{13}\text{C}$  NMR (100 MHz,  $\text{DMSO-}d_6$ )  $\delta$ : 190.5, 161.0, 158.7, 140.5, 137.3, 137.1, 136.9, 131.7, 128.9, 128.8, 123.3, 123.1, 123.0, 115.3, 110.8, 110.6, 99.1, 98.8; IR (neat  $\text{cm}^{-1}$ ): 1655 (C=O); LRMS (EI 70 ev)  $m/z$  (%): 239 ( $\text{M}^+$ , 100); HRMS  $m/z$  (ESI) calcd for  $\text{C}_{15}\text{H}_{10}\text{FNNaO}$  ( $\text{M}+\text{Na}$ ) $^+$  262.0638, found 262.0644.

(D) Spectra

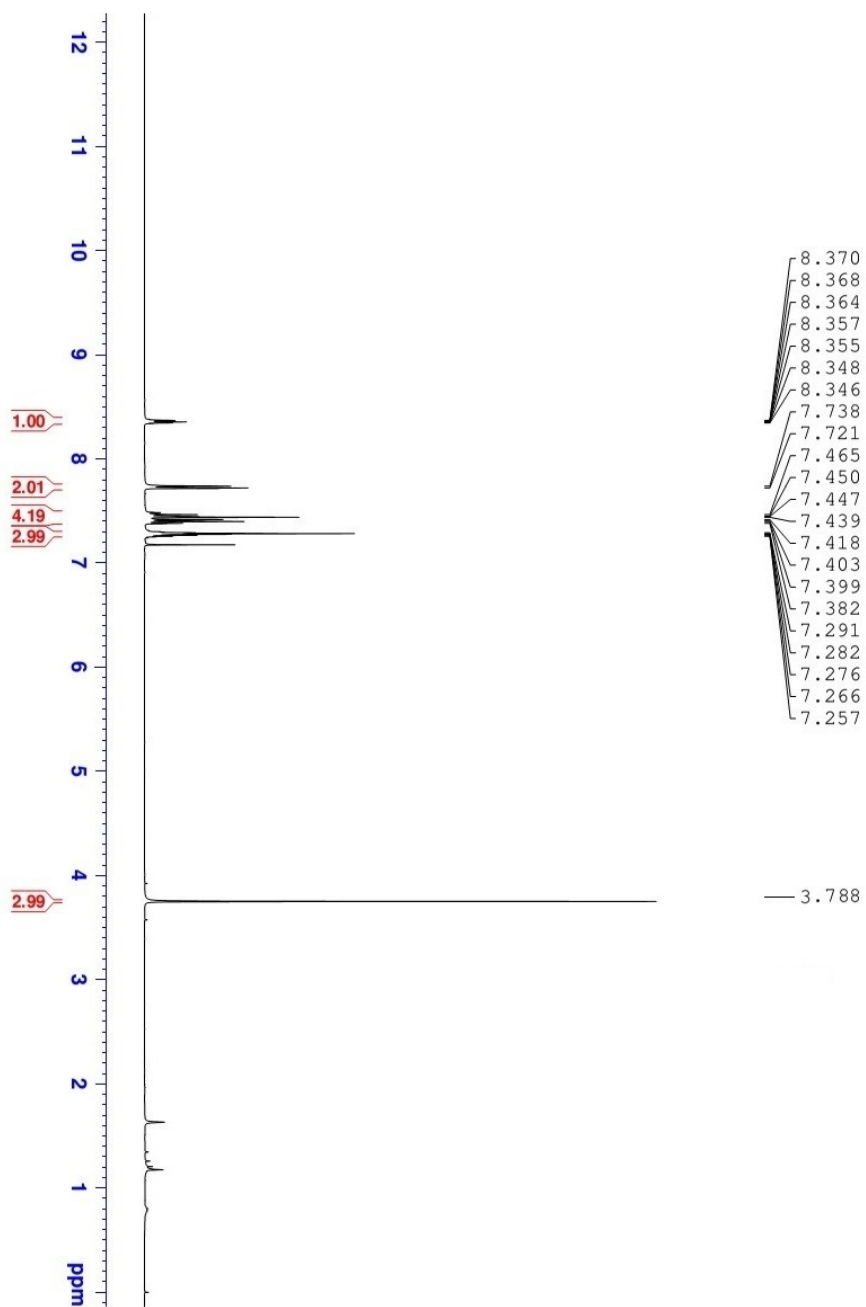

<sup>1</sup>H NMR of Compound 3aa

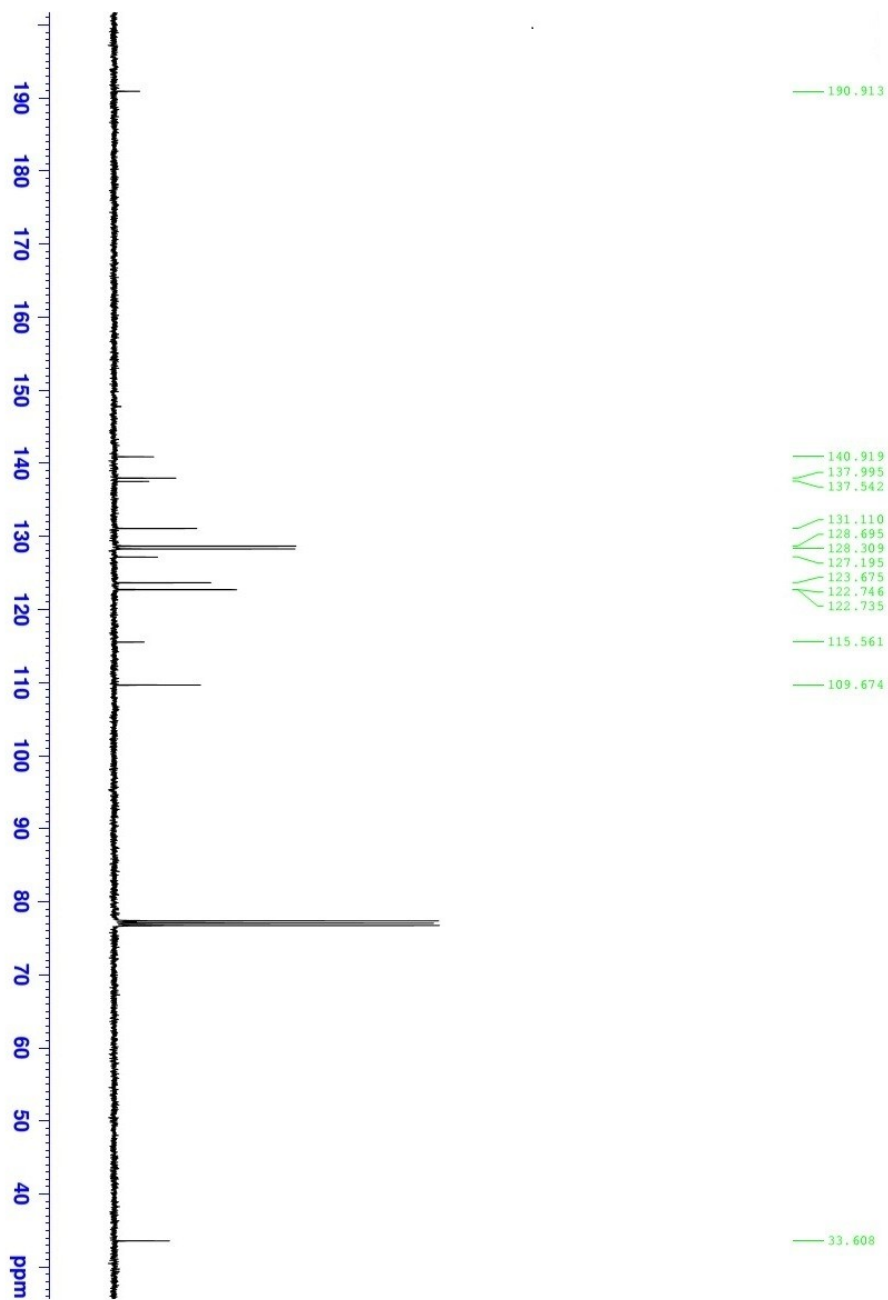

<sup>13</sup>C NMR of Compound 3aa

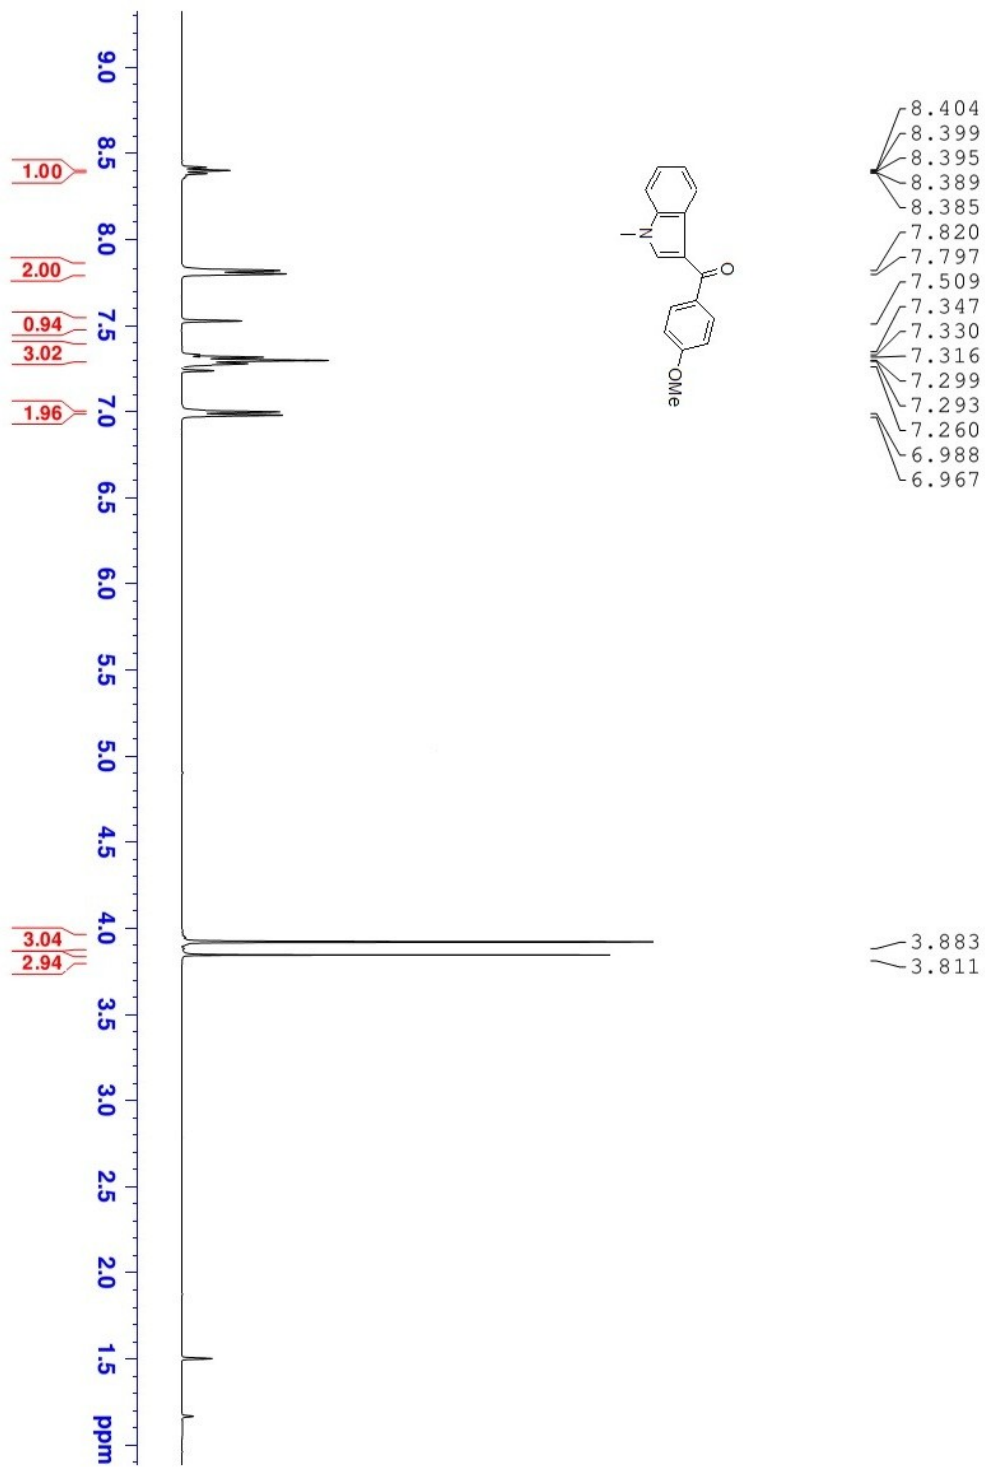

**<sup>1</sup>H NMR of Compound 3ab**

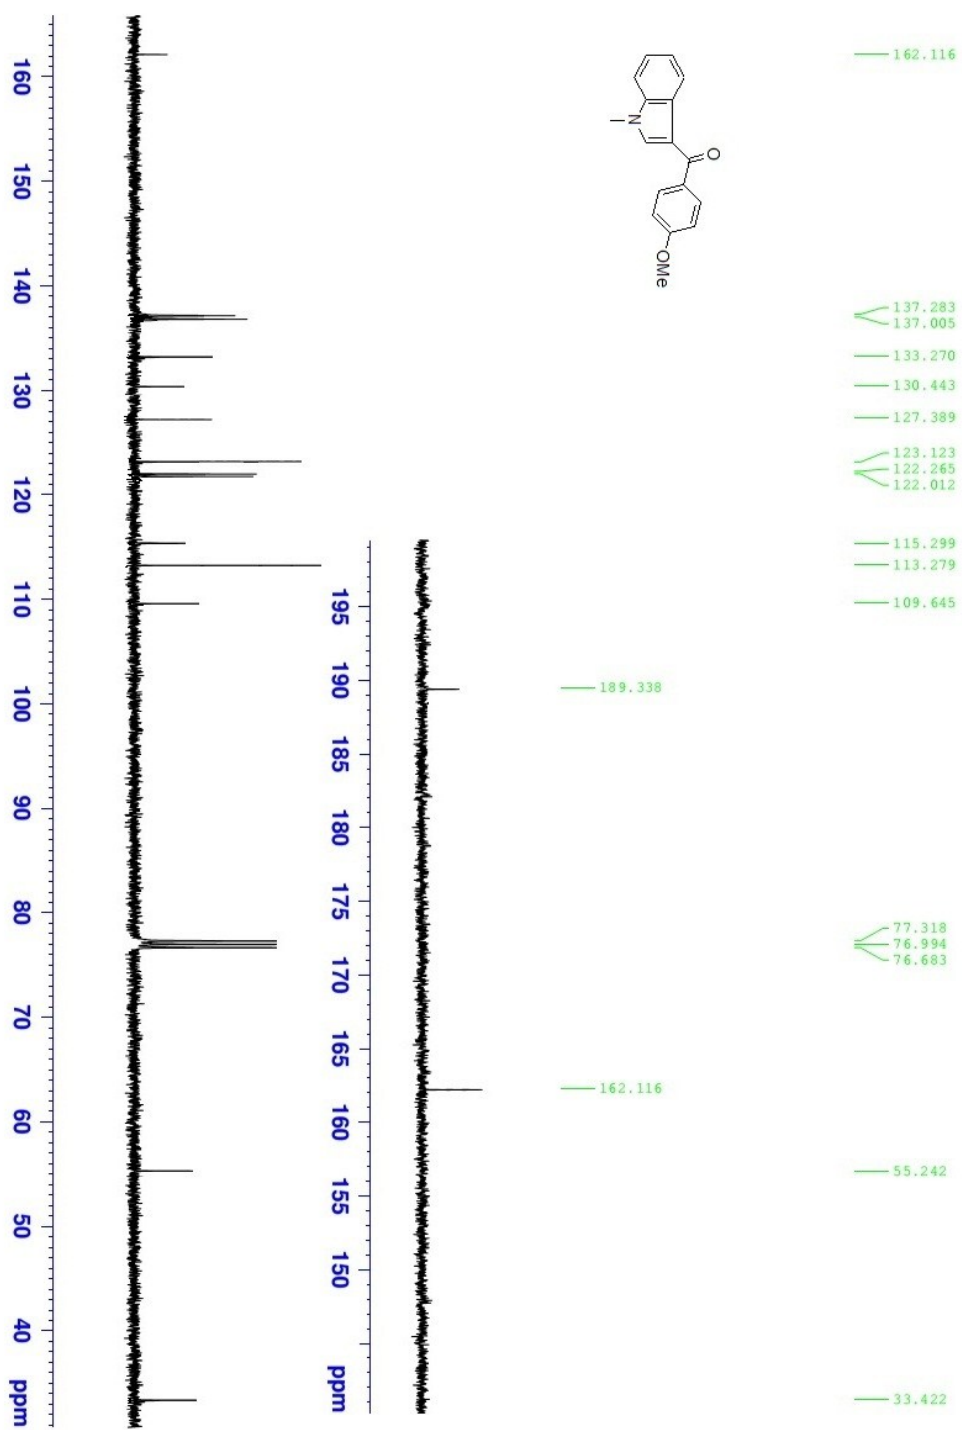

<sup>13</sup>C NMR of Compound 3ab

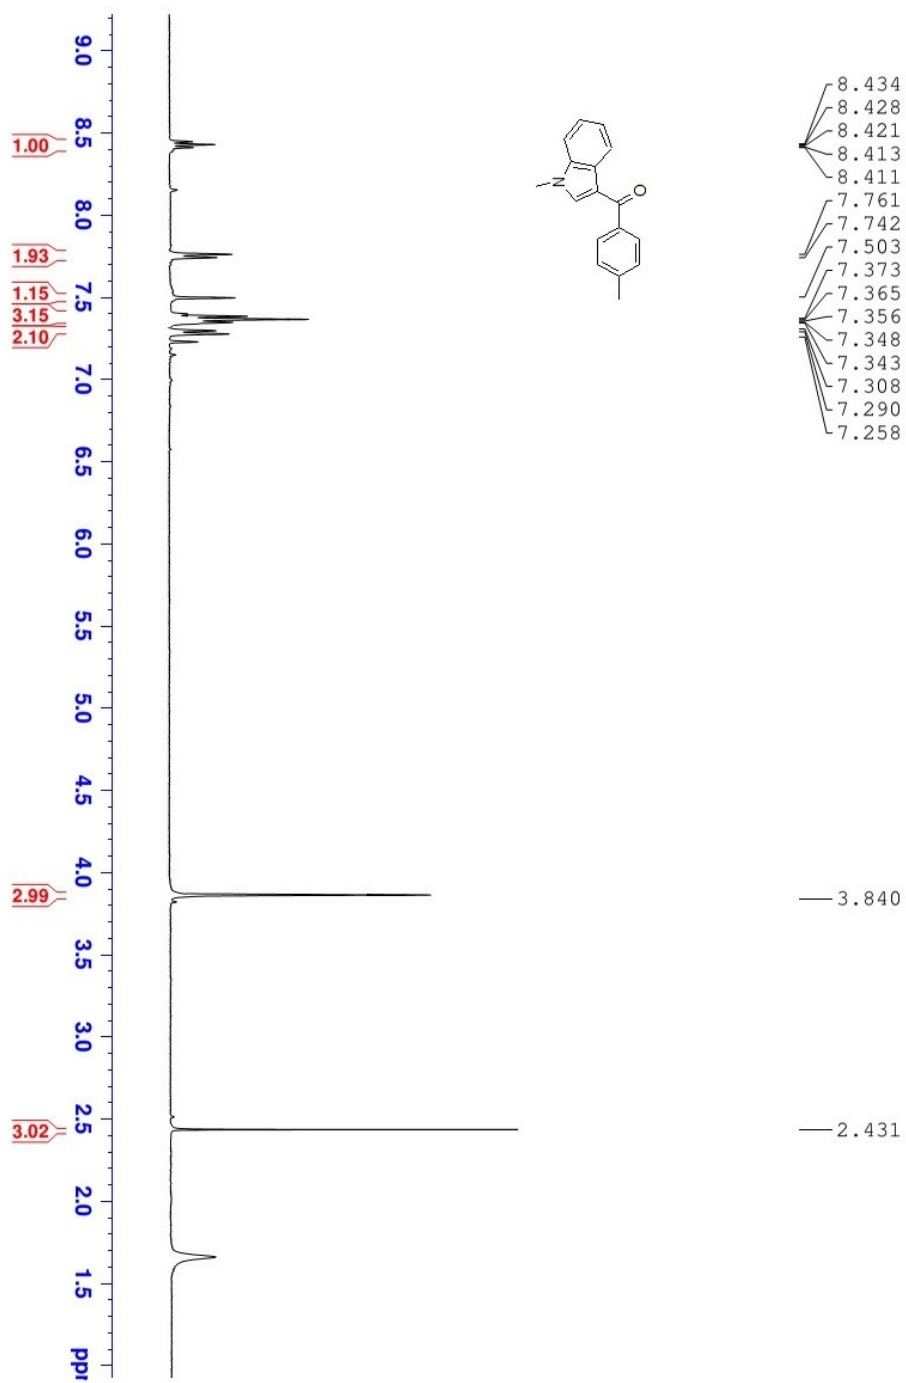

**<sup>1</sup>H NMR of Compound 3ac**

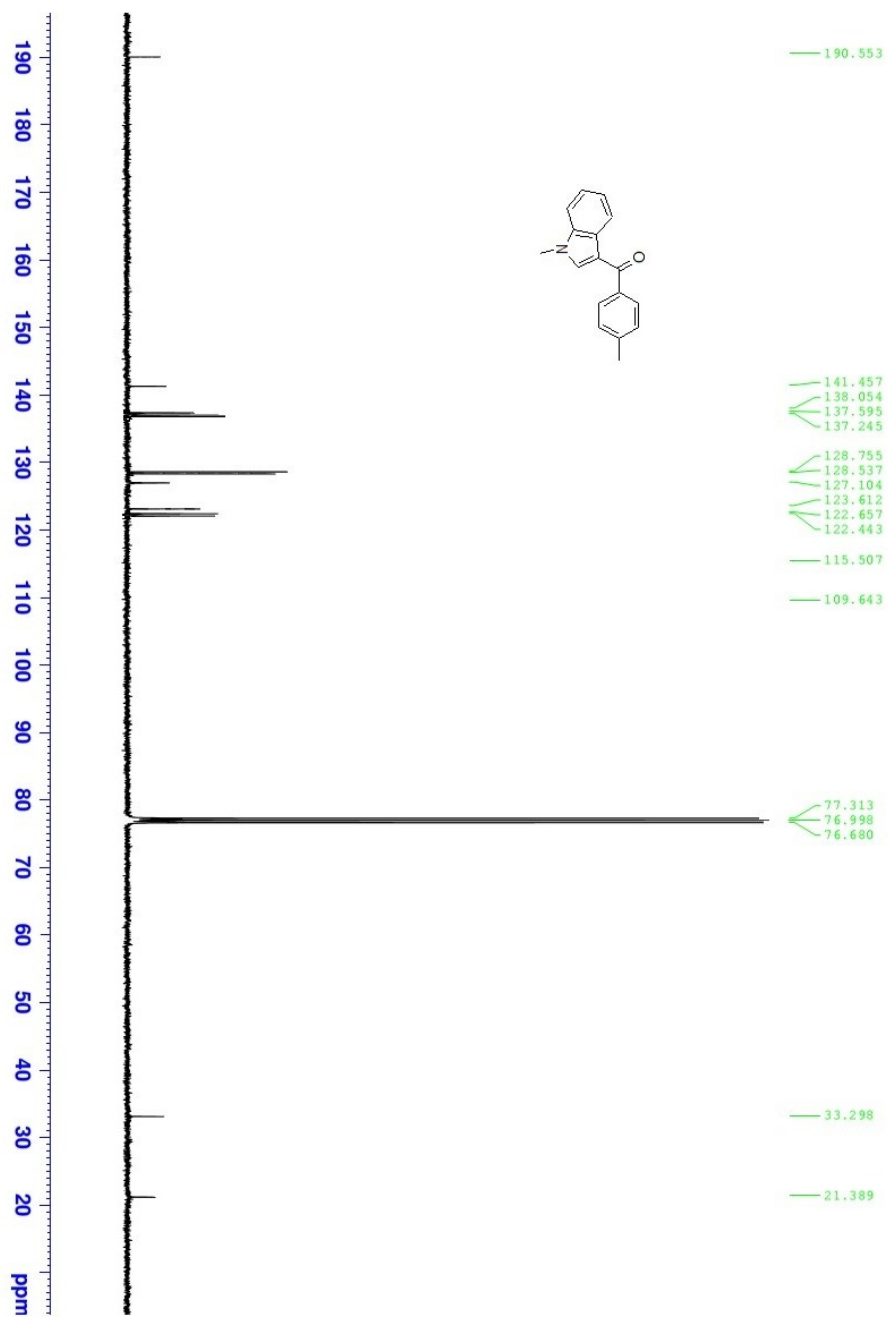

**<sup>13</sup>C NMR of Compound 3ac**

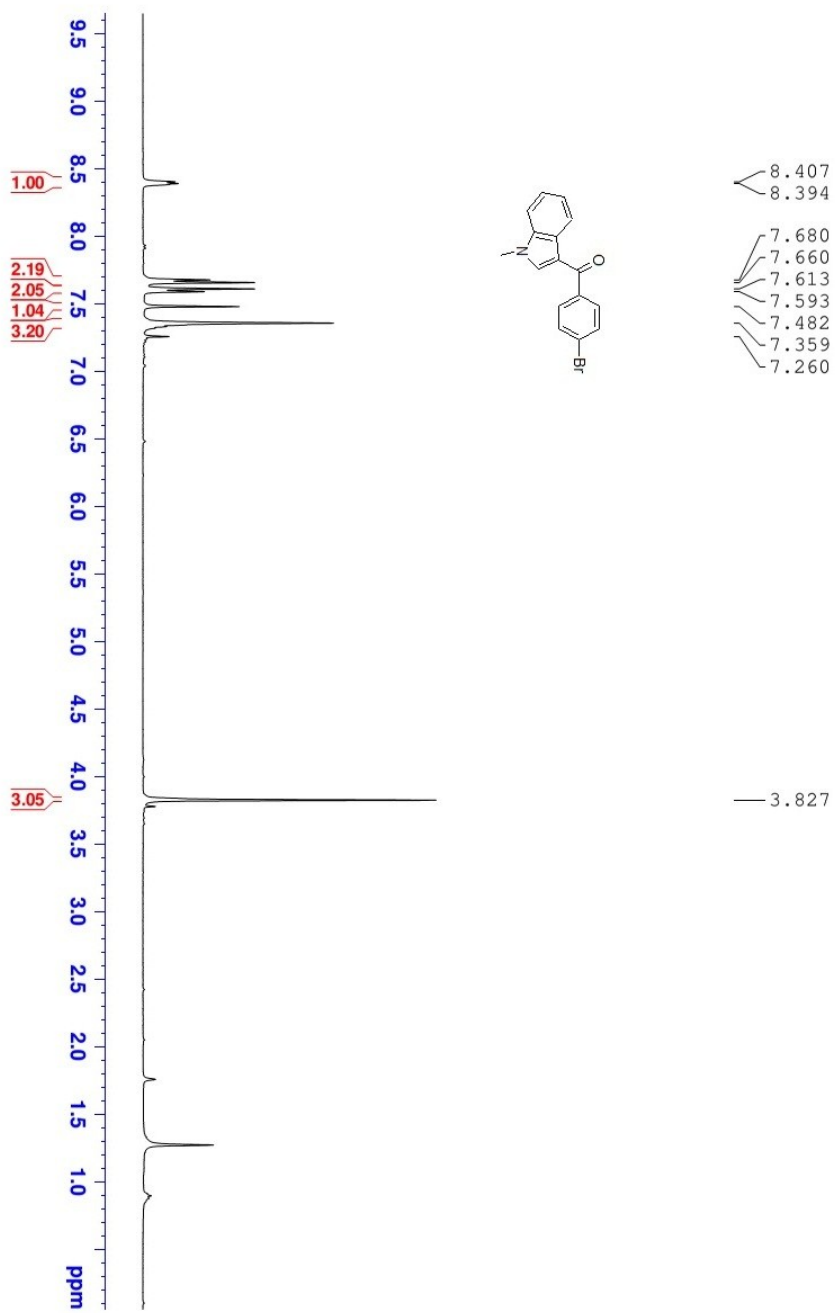

**<sup>1</sup>H NMR of Compound 3ad**



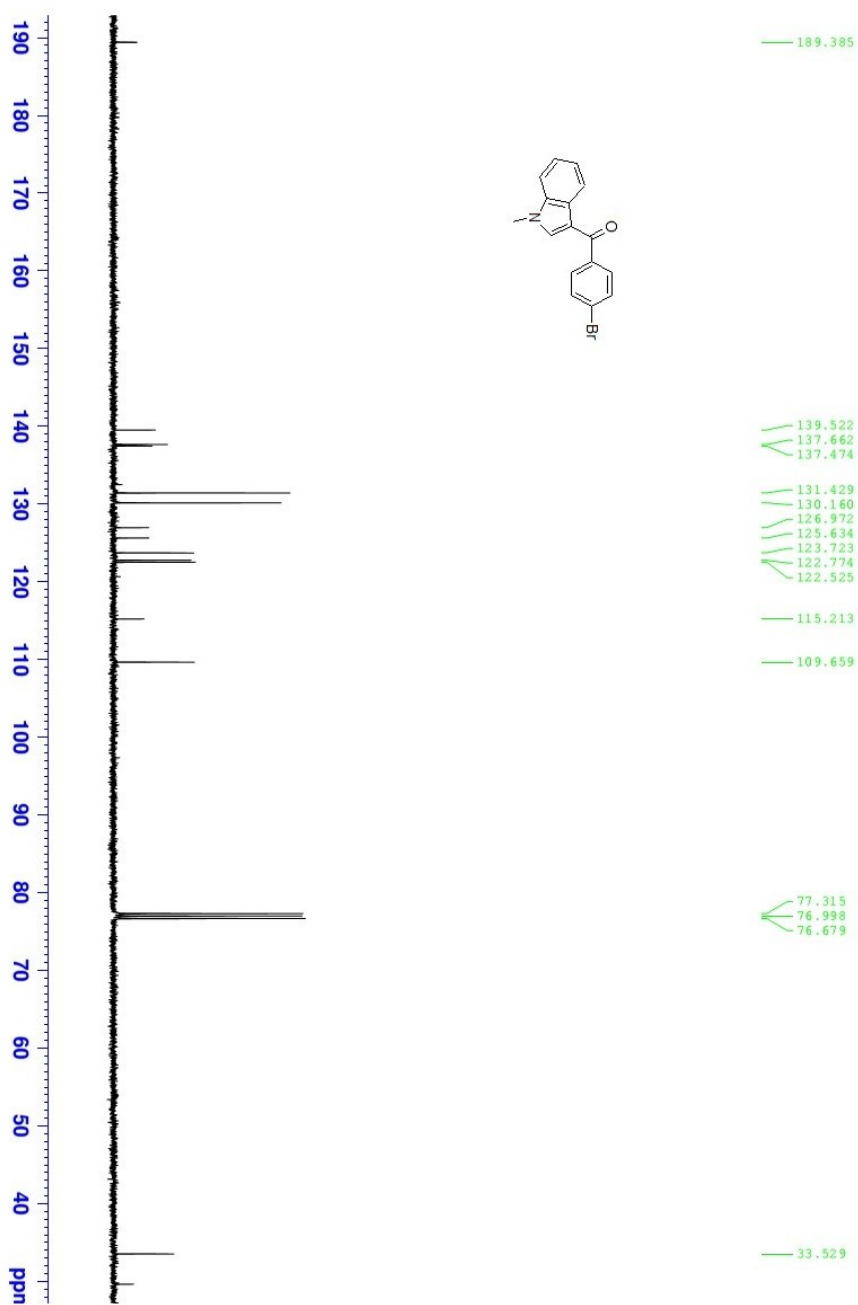

<sup>13</sup>C NMR of Compound 3ad

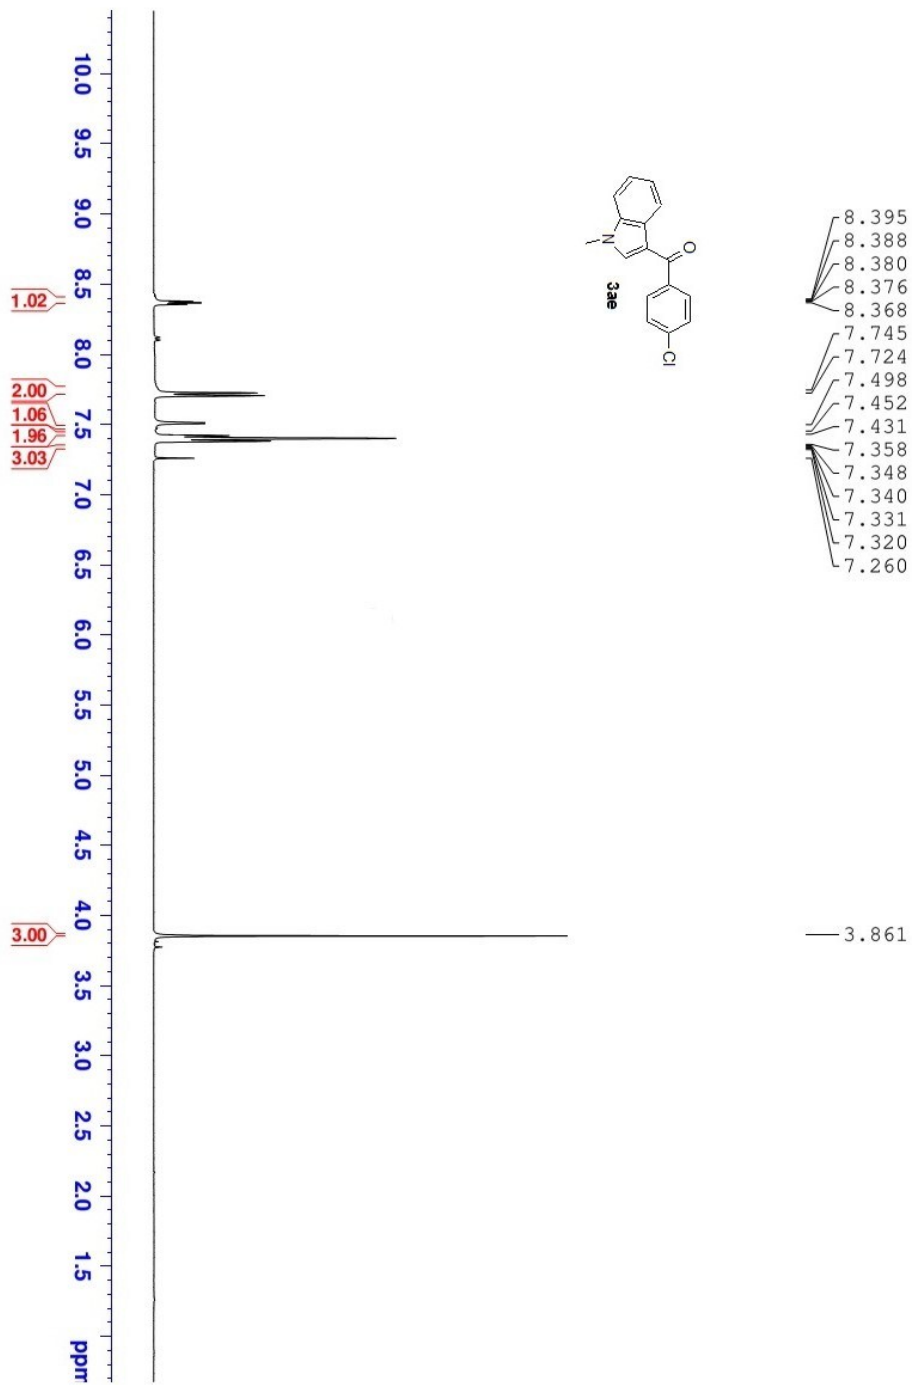

<sup>1</sup>H NMR of Compound 3ae

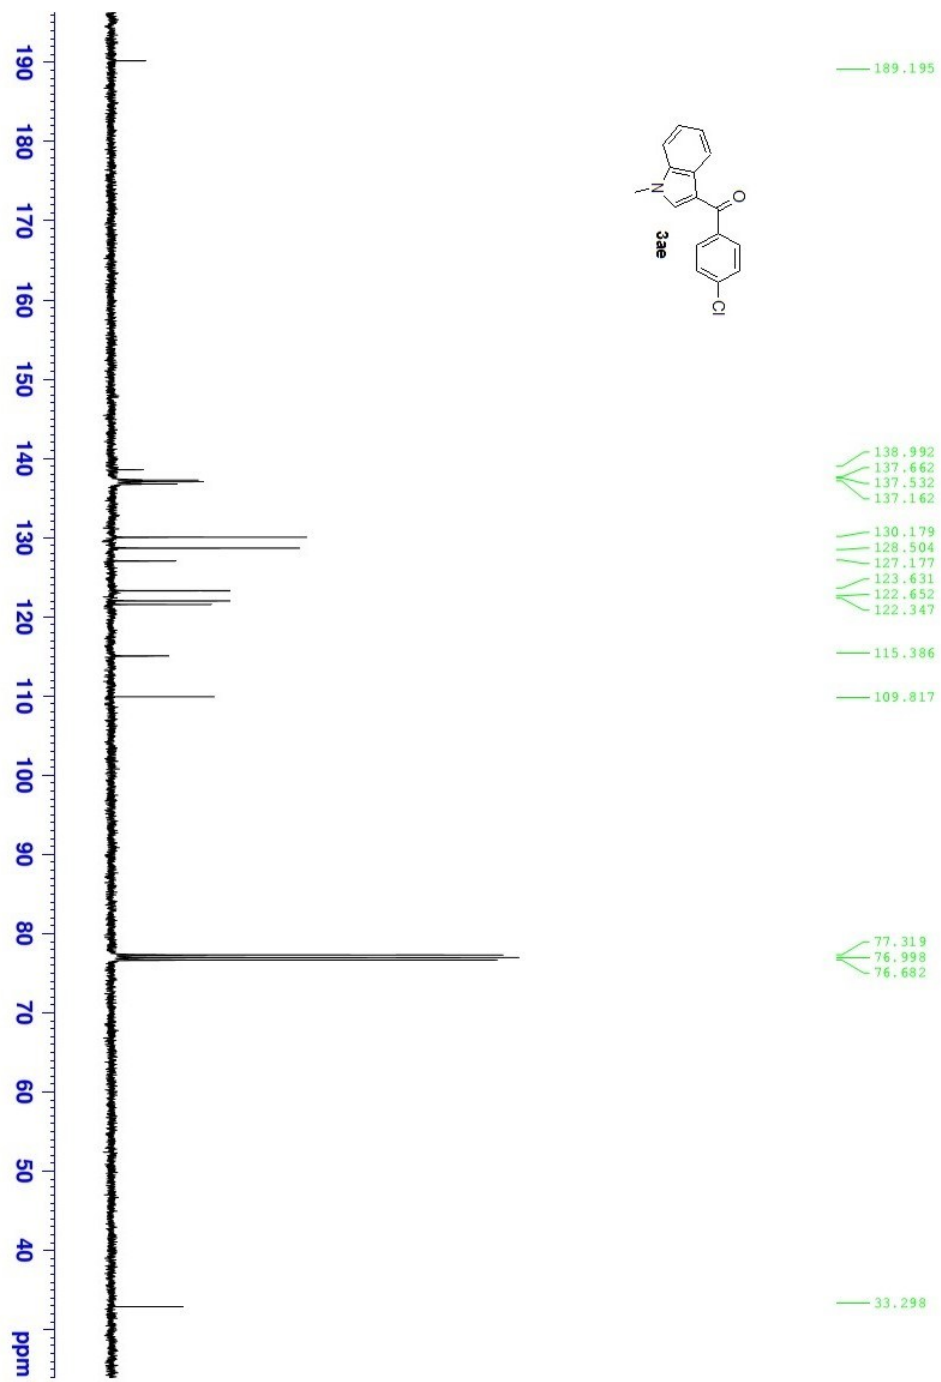

<sup>13</sup>C NMR of Compound 3ae

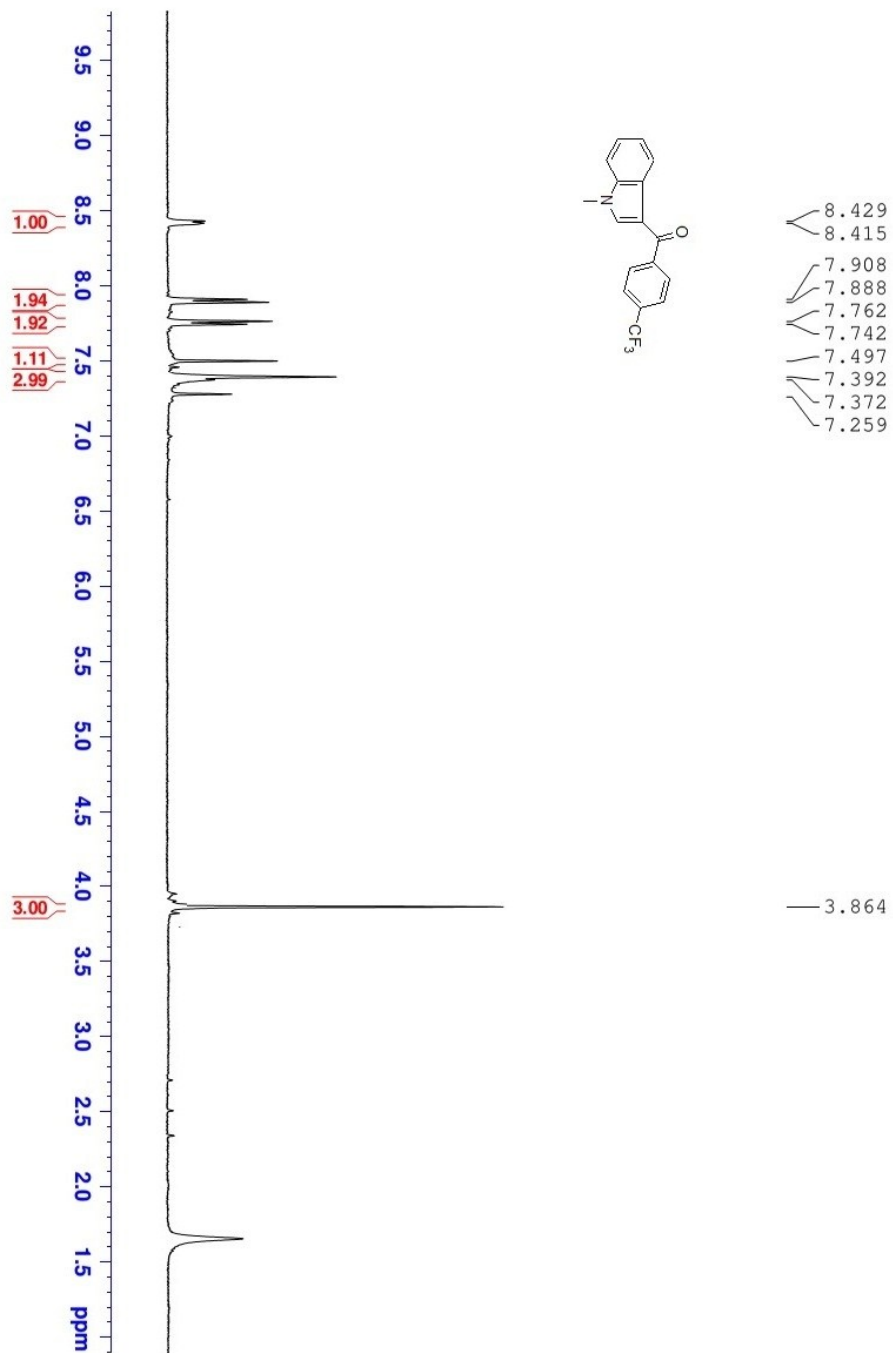

**<sup>1</sup>H NMR of Compound 3af**

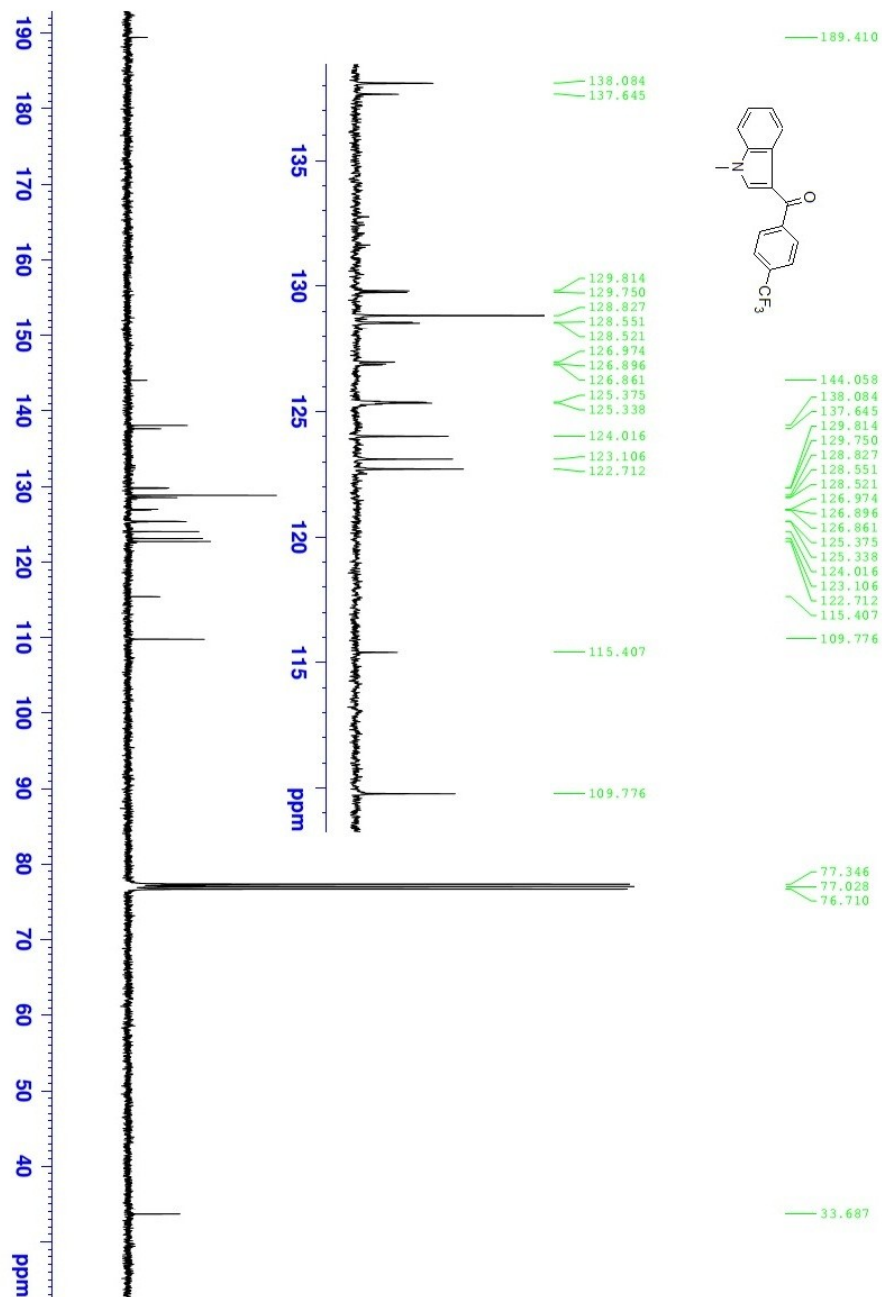

**<sup>13</sup>C NMR of Compound 3af**

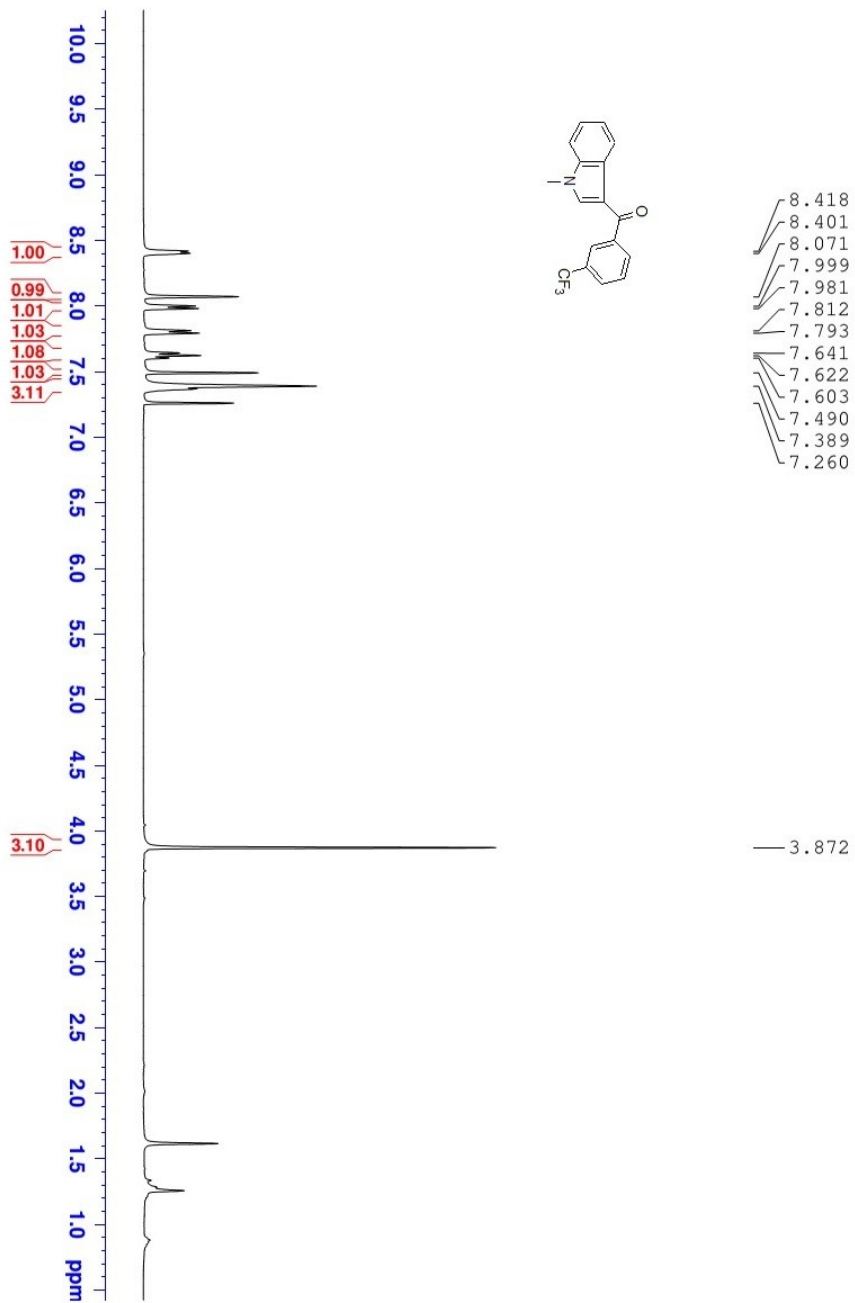

**<sup>1</sup>H NMR of Compound 3ag**

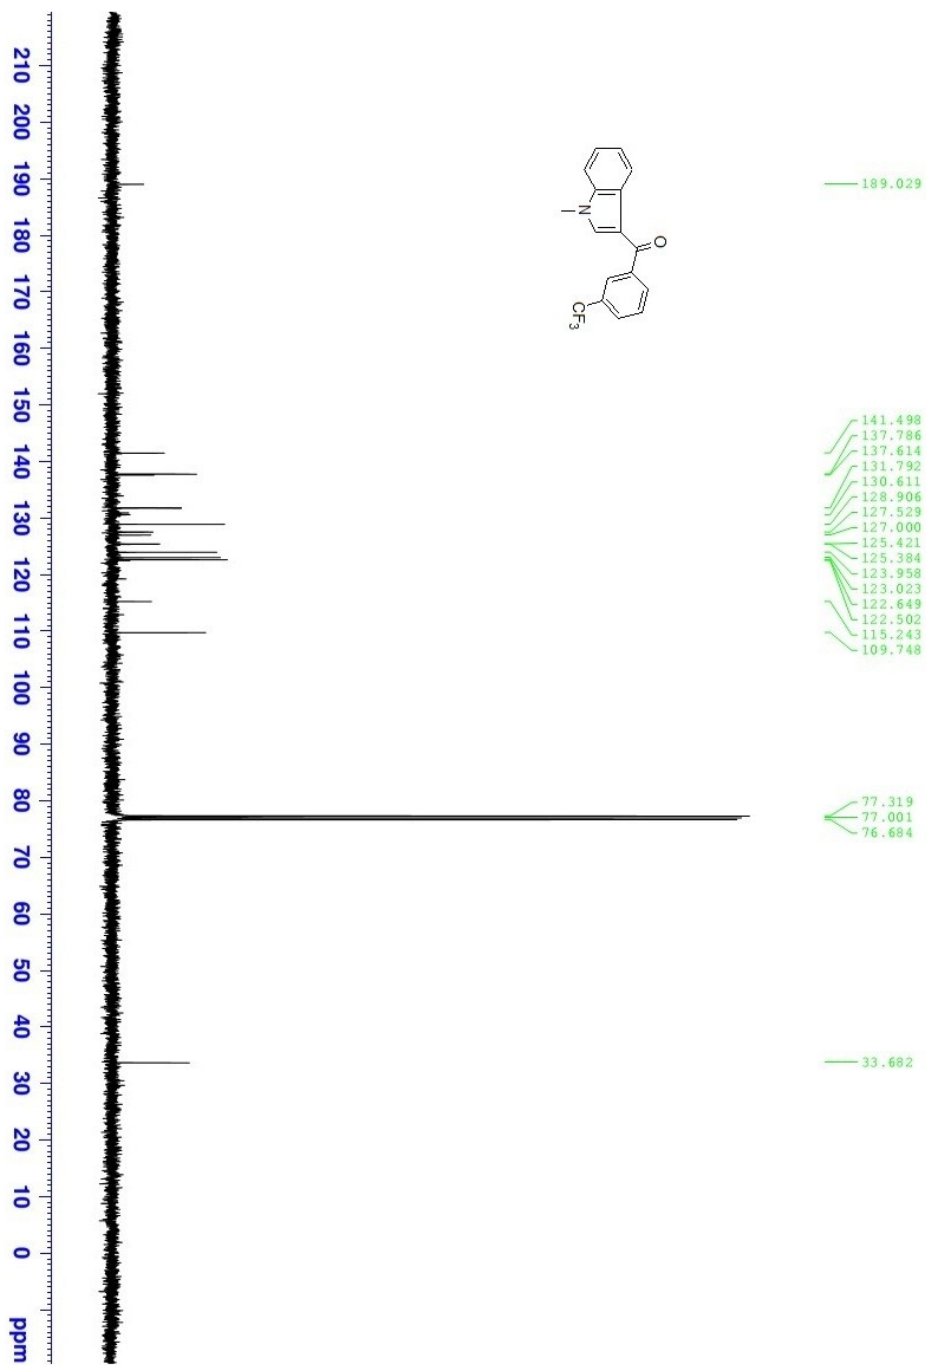

**<sup>13</sup>C NMR of Compound 3ag**

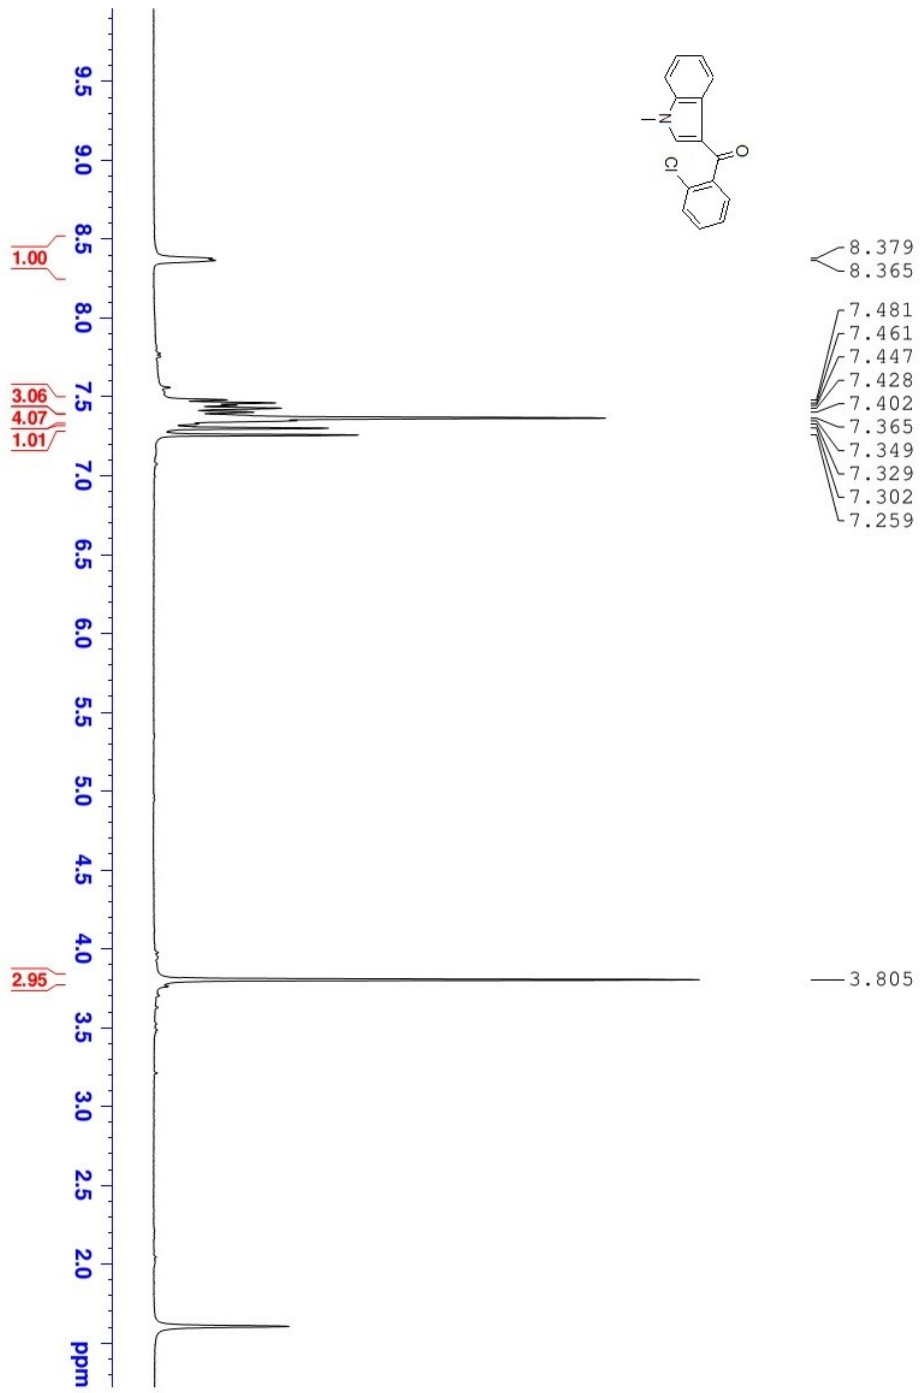



### <sup>1</sup>H NMR of Compound 3ah

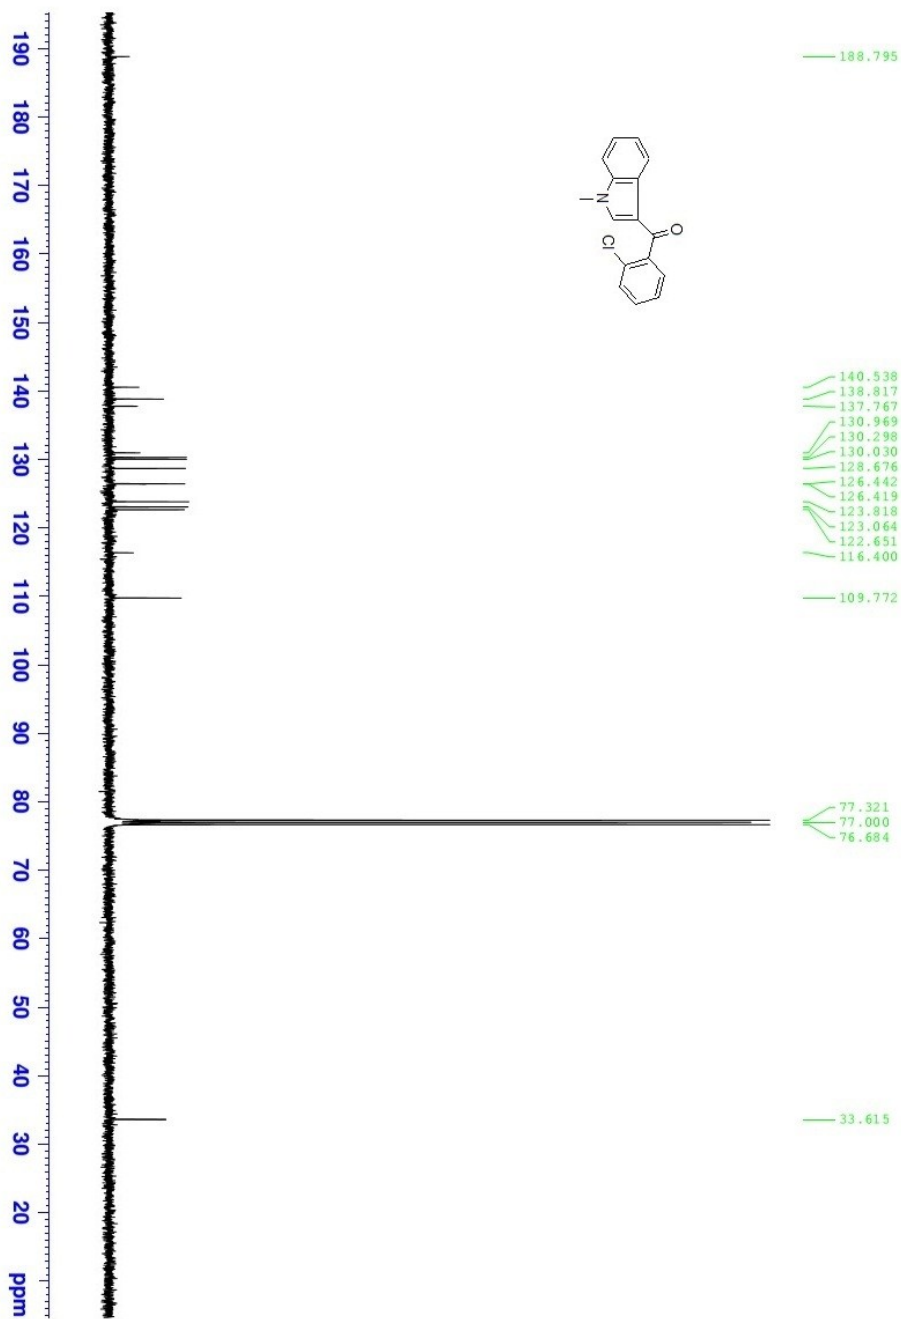

### <sup>13</sup>C NMR of Compound 3ah

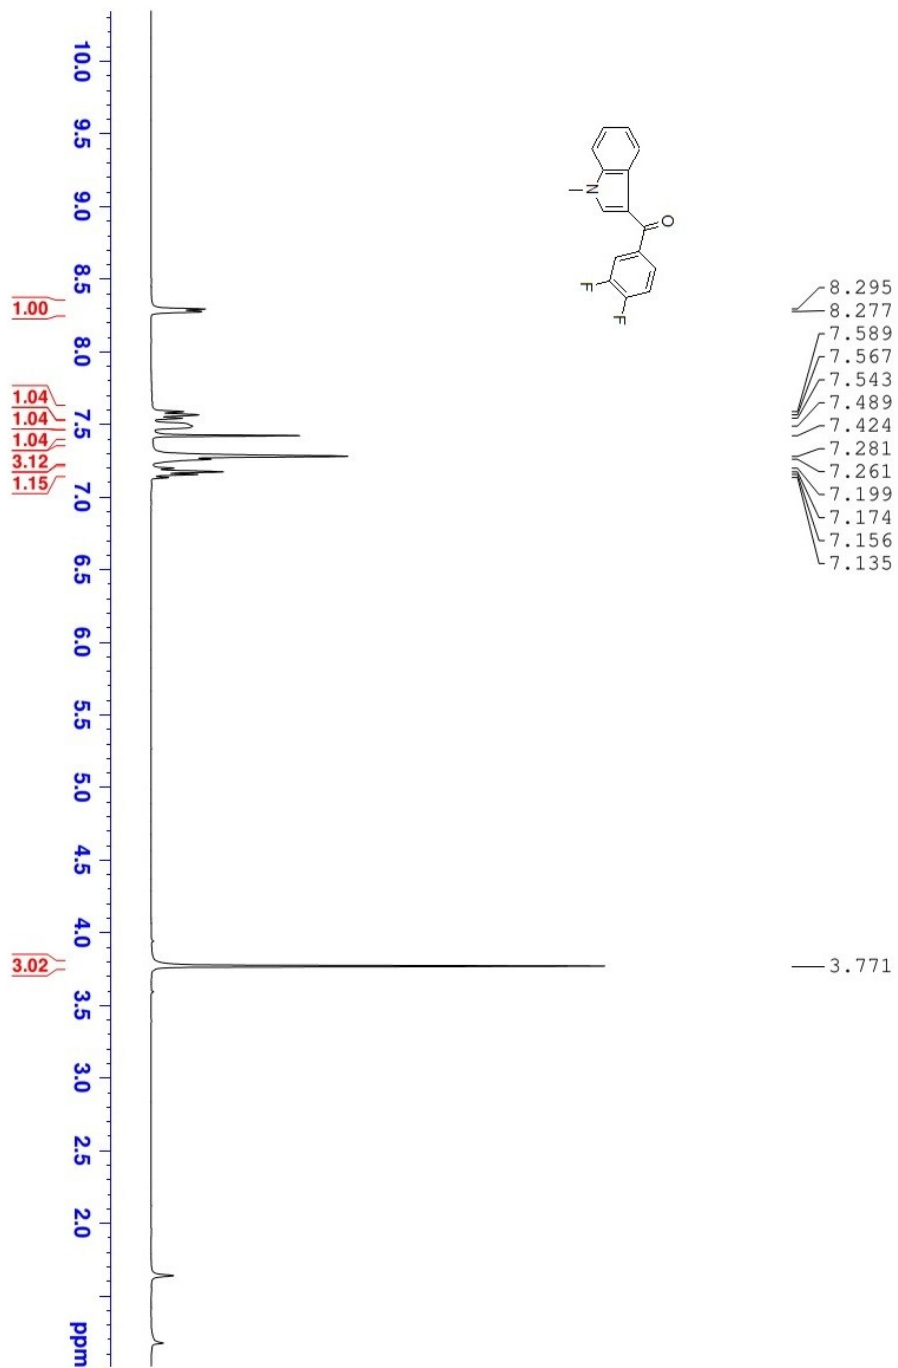

**<sup>1</sup>H NMR of Compound 3ai**

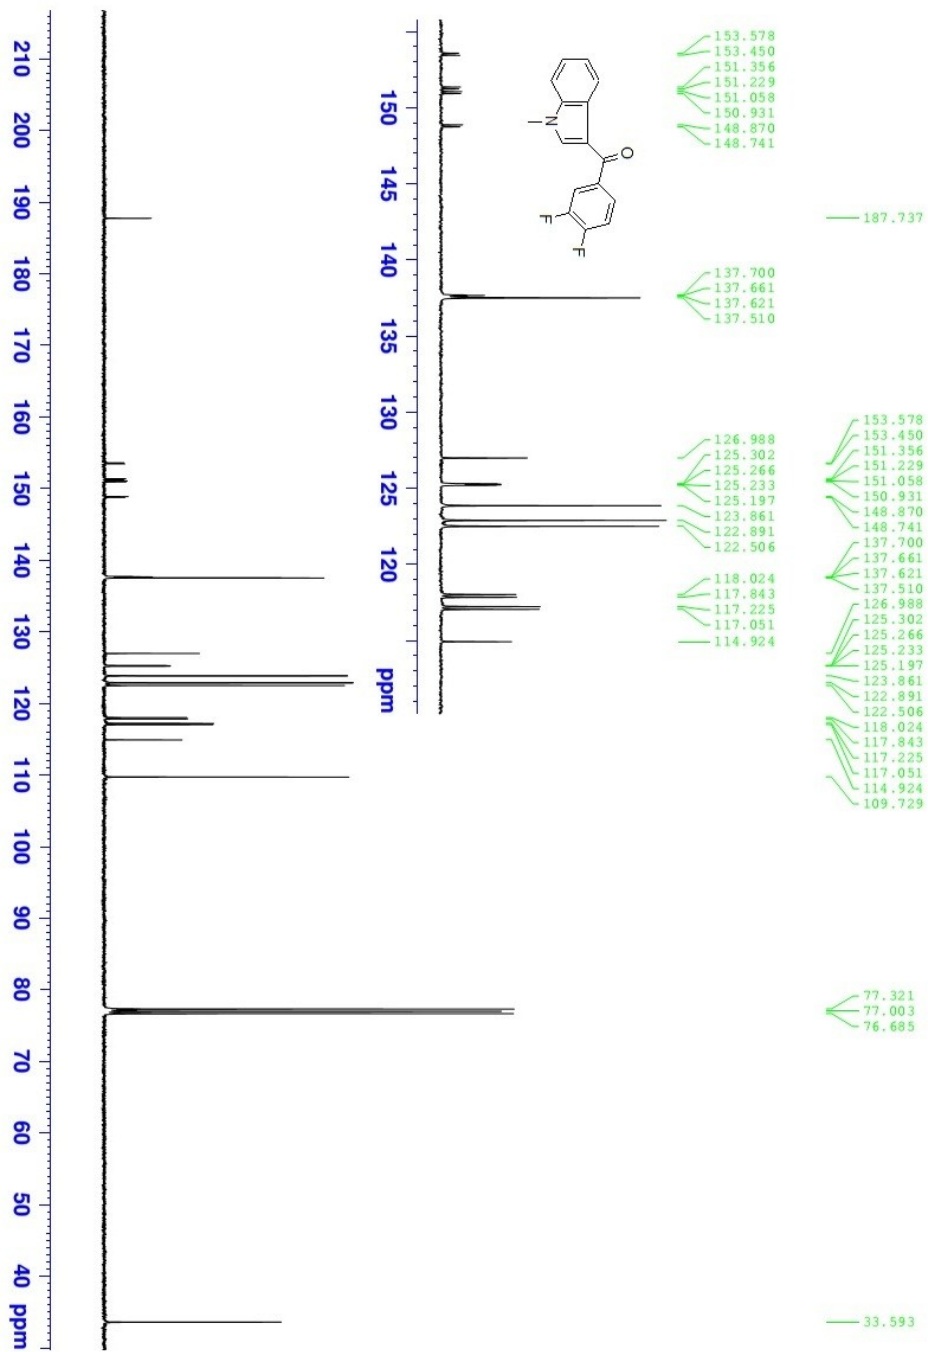

<sup>13</sup>C NMR of Compound 3ai

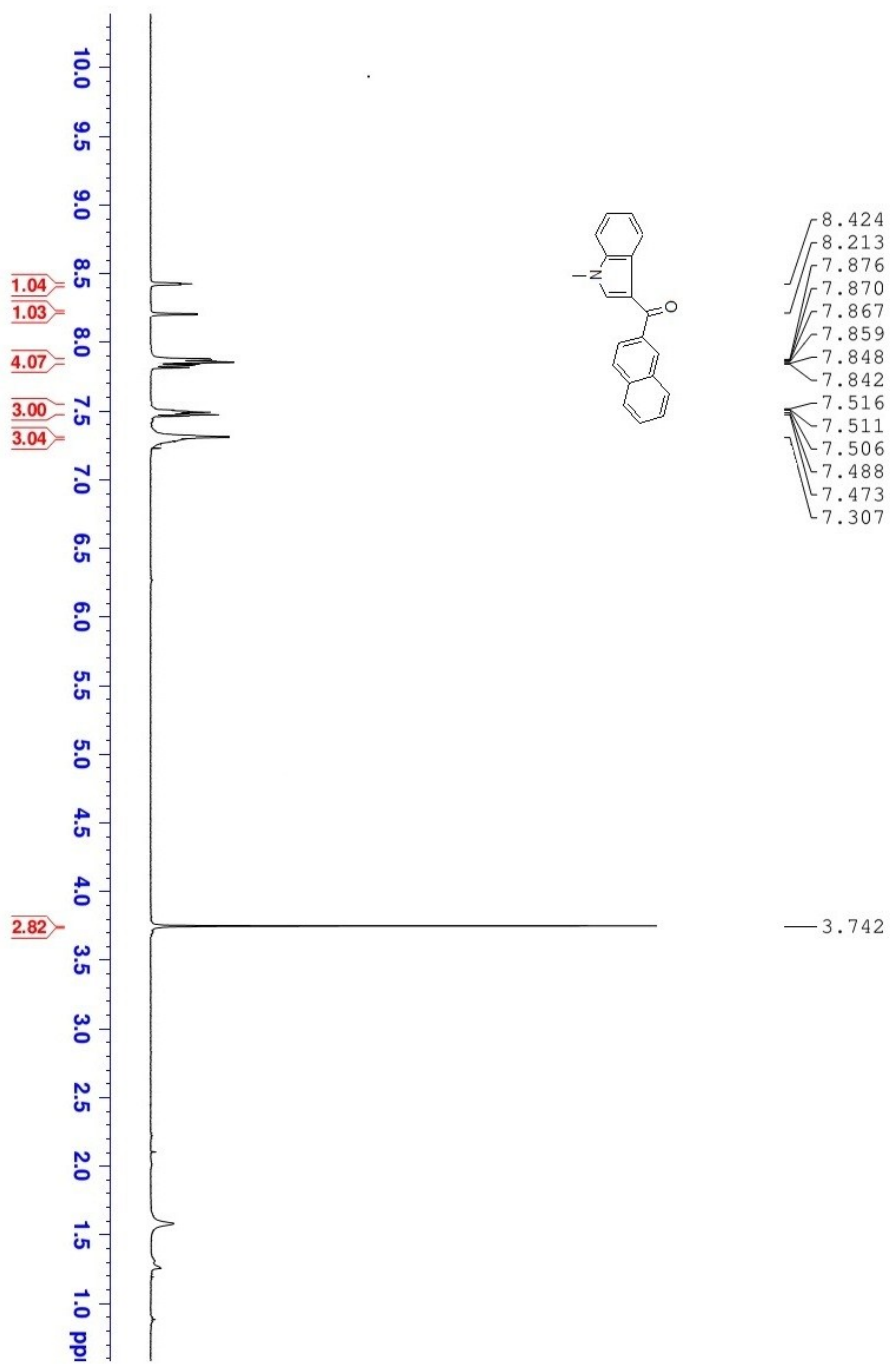

**<sup>1</sup>H NMR of Compound 3aj**

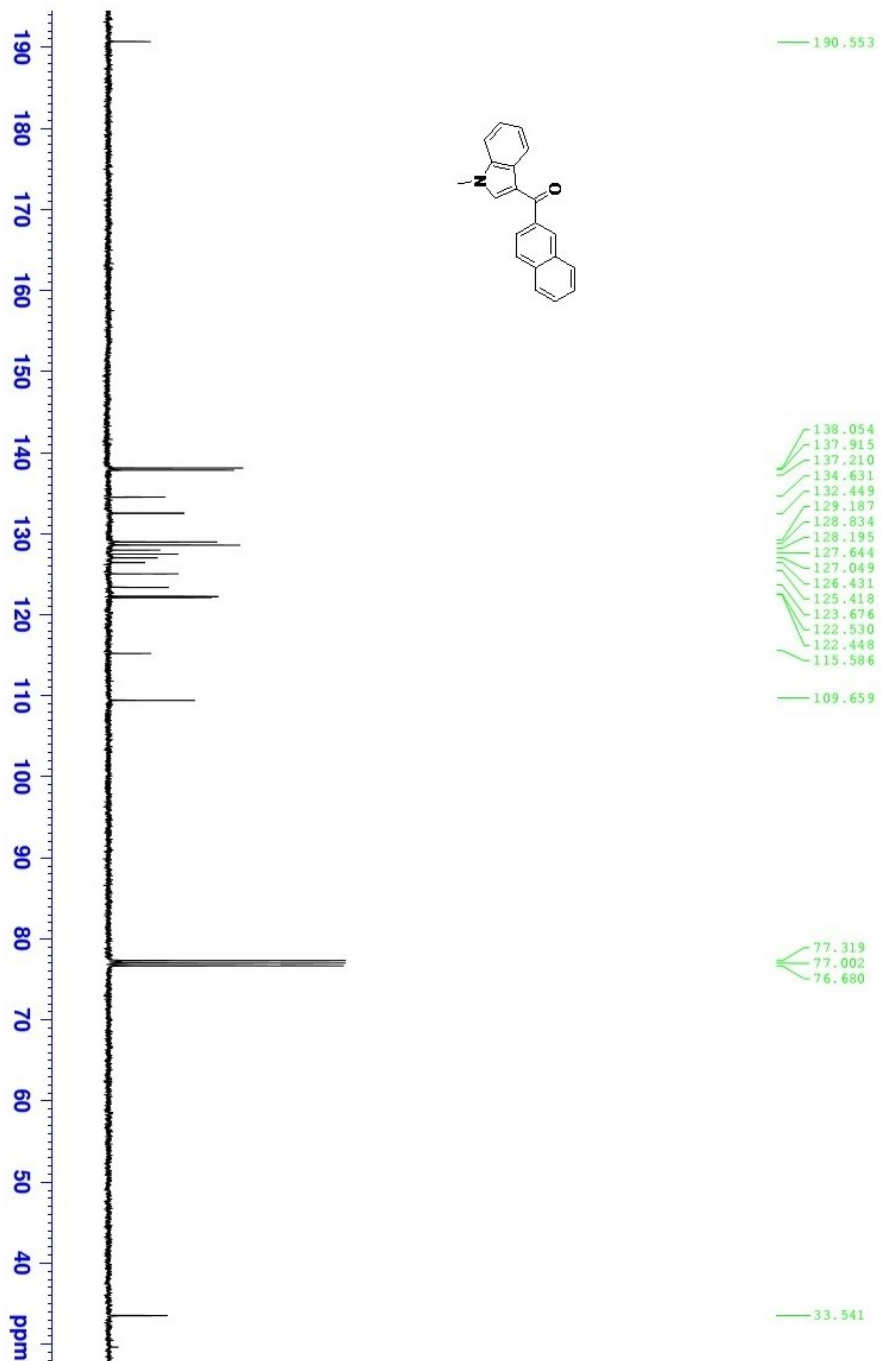

<sup>13</sup>C NMR of Compound 3aj

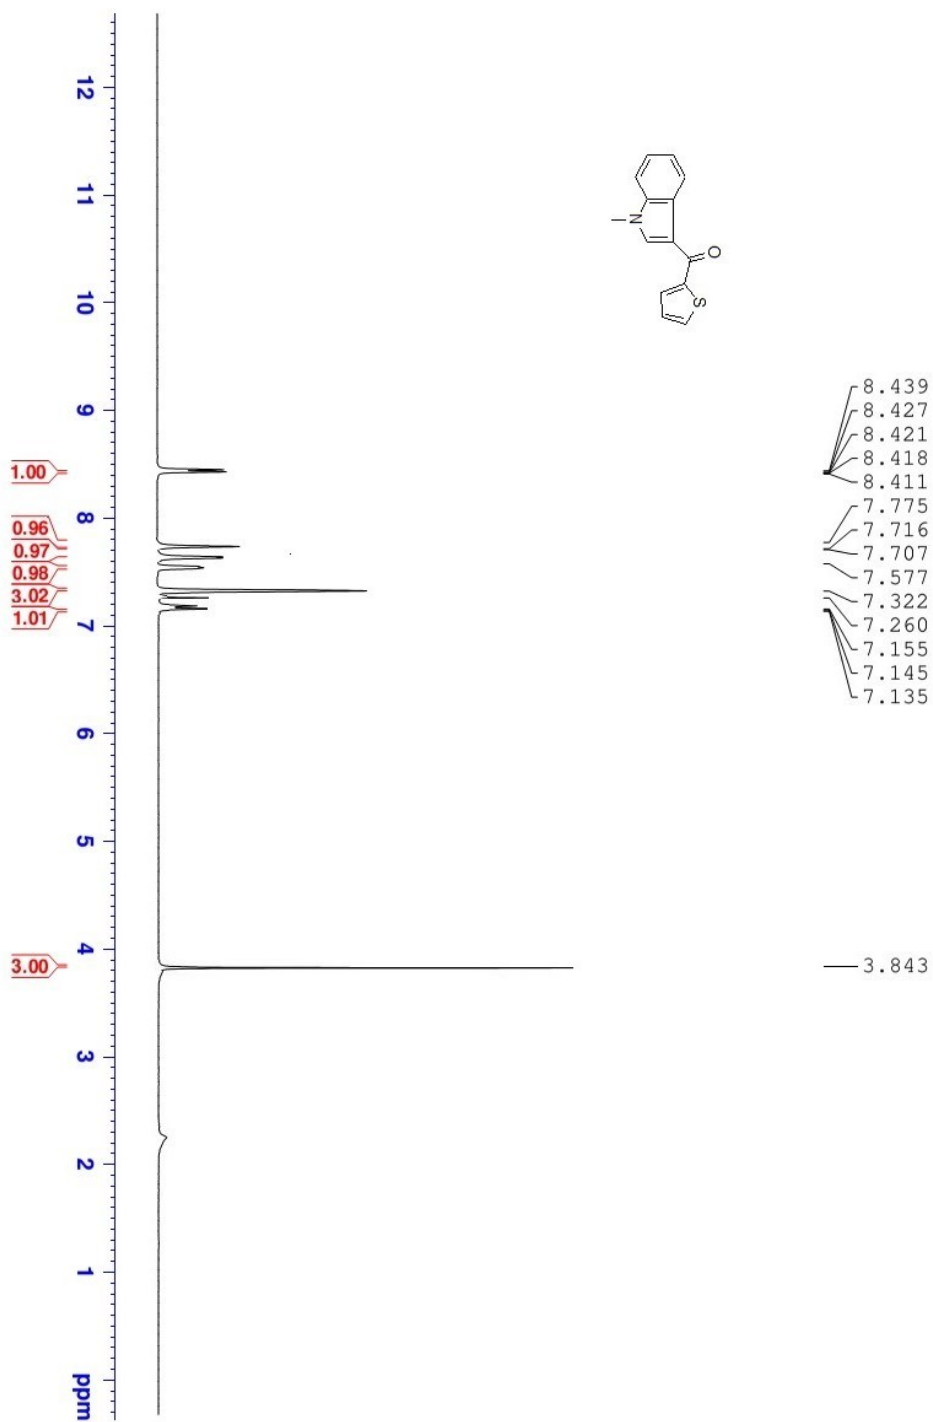

**<sup>1</sup>H NMR of Compound 3ak**

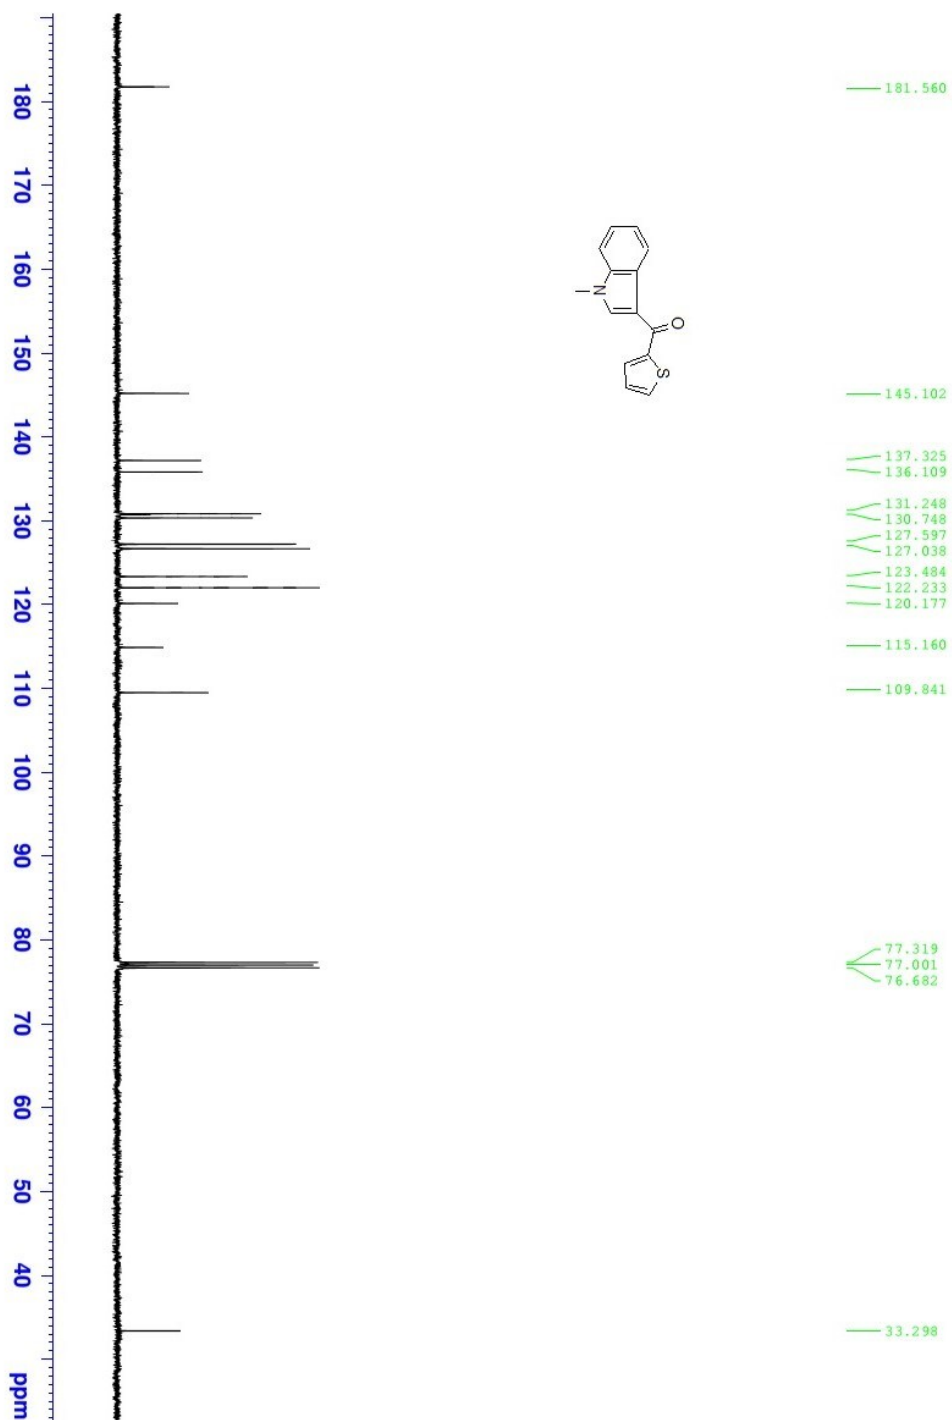

<sup>13</sup>C NMR of Compound 3ak

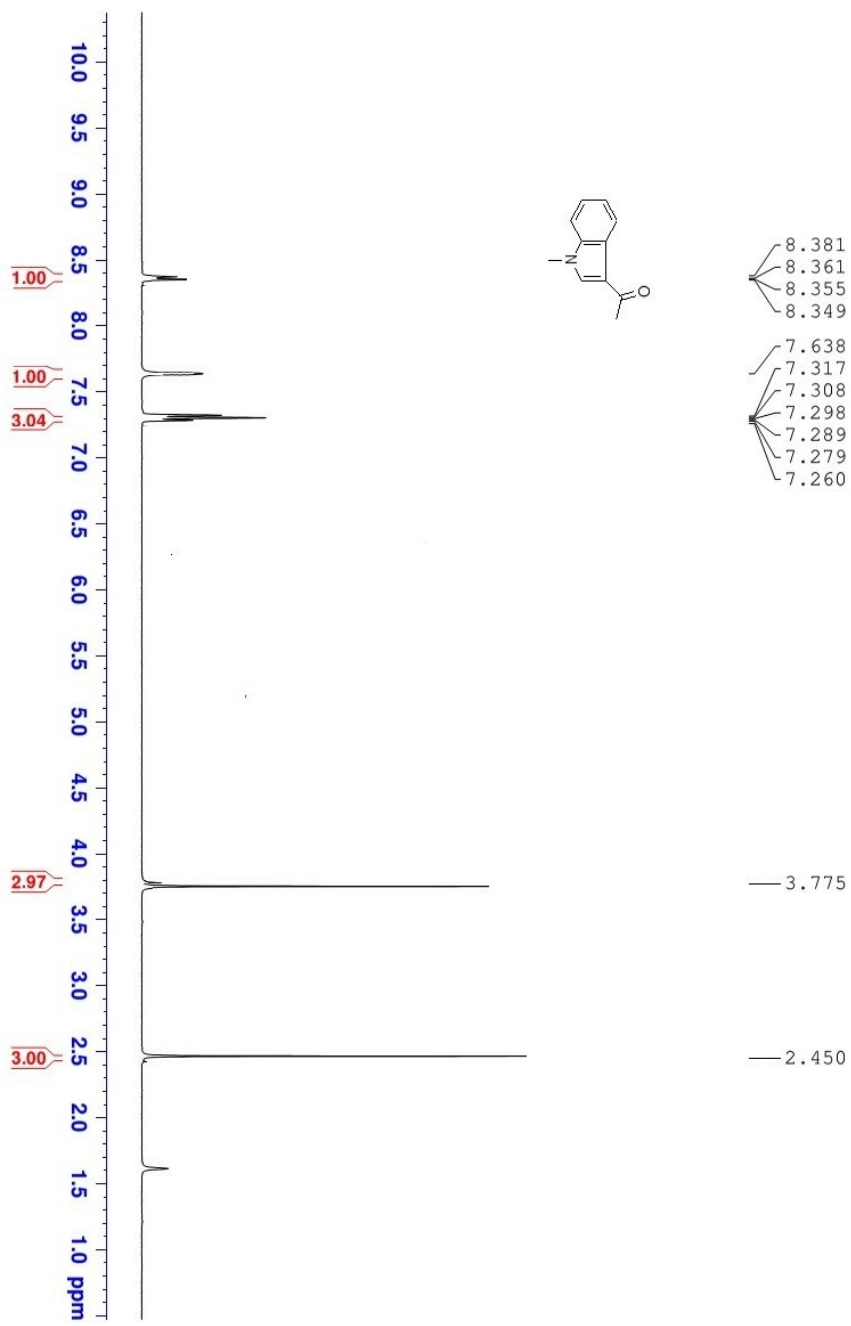

**<sup>1</sup>H NMR of Compound 3al**



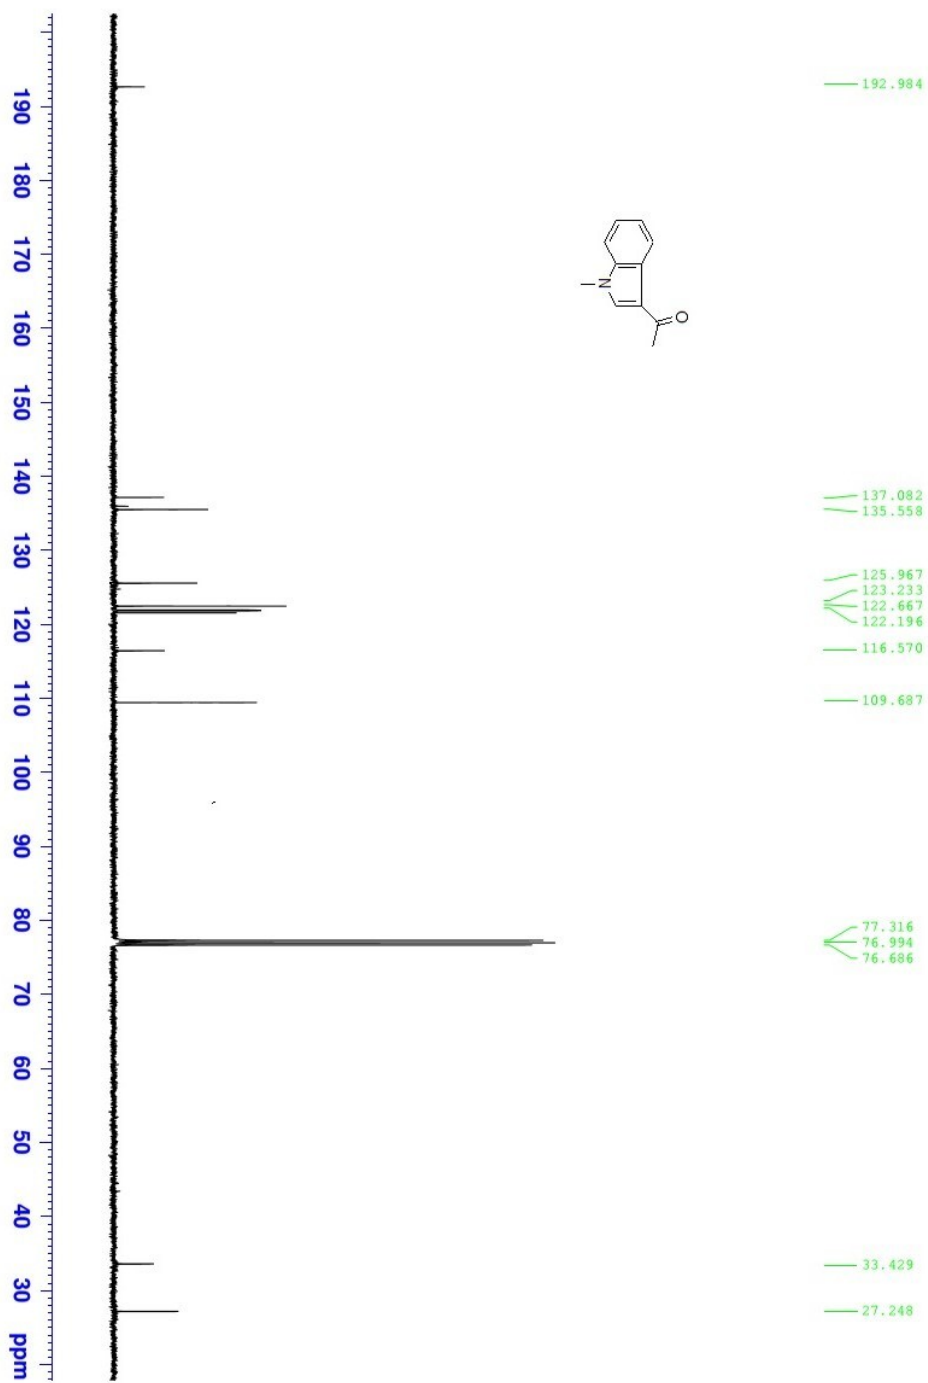

<sup>13</sup>C NMR of Compound 3al

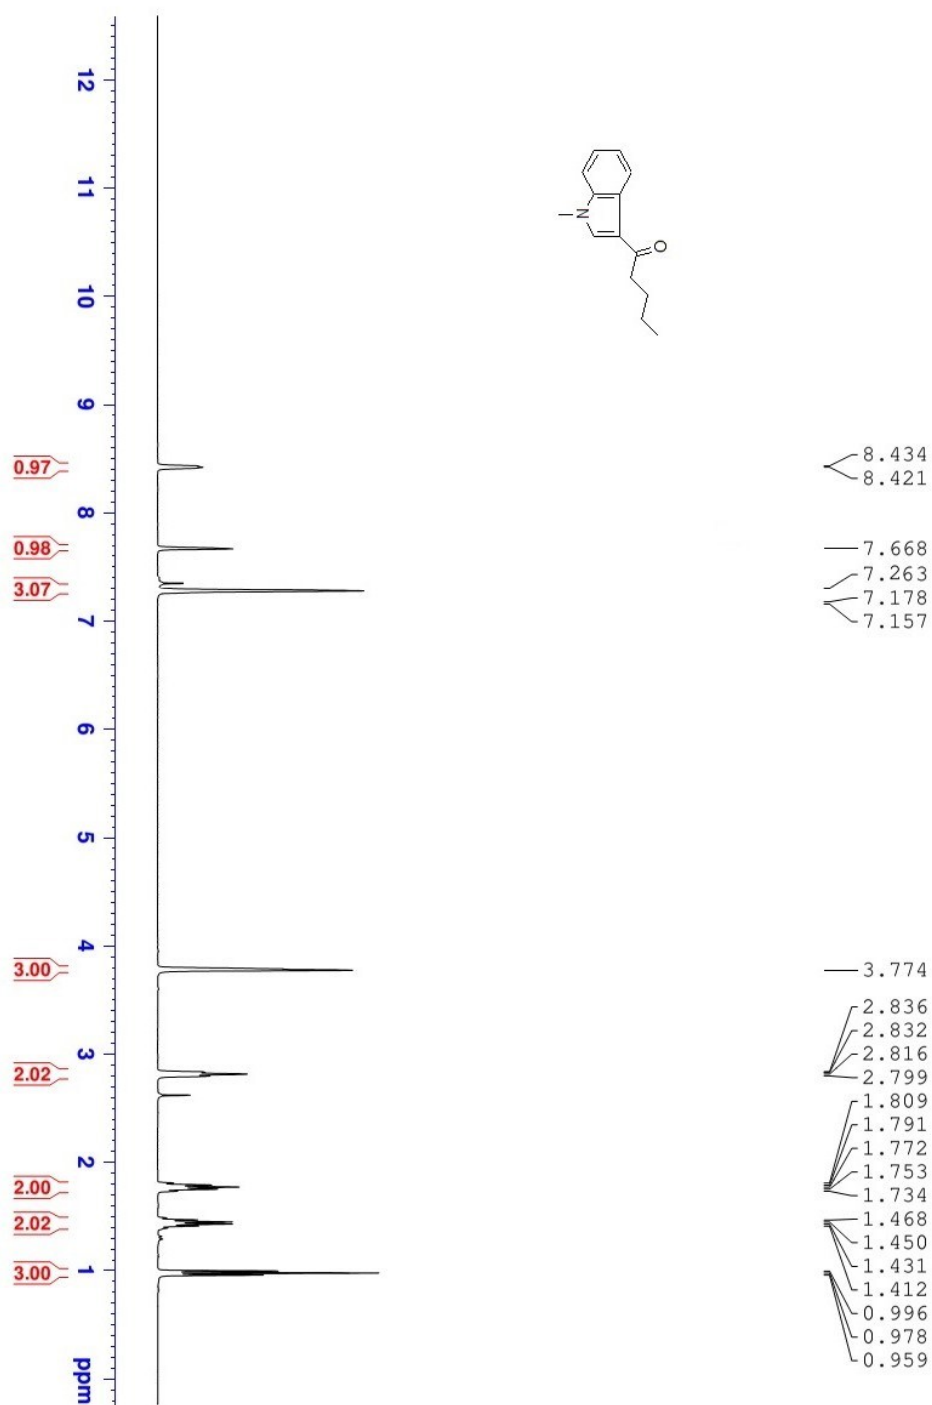

<sup>1</sup>H NMR of Compound 3am

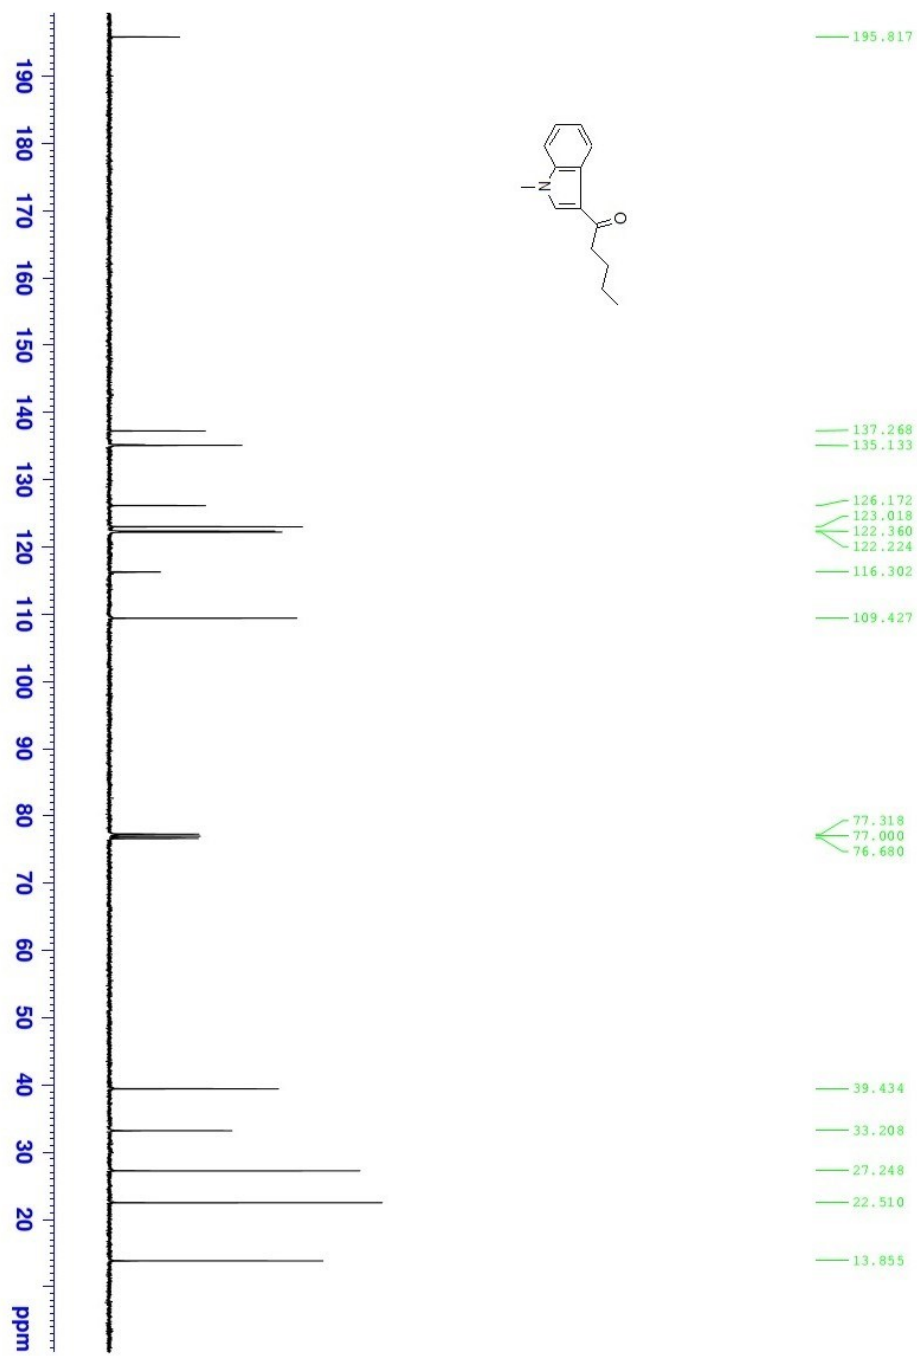

**$^{13}\text{C}$  NMR of Compound 3am**

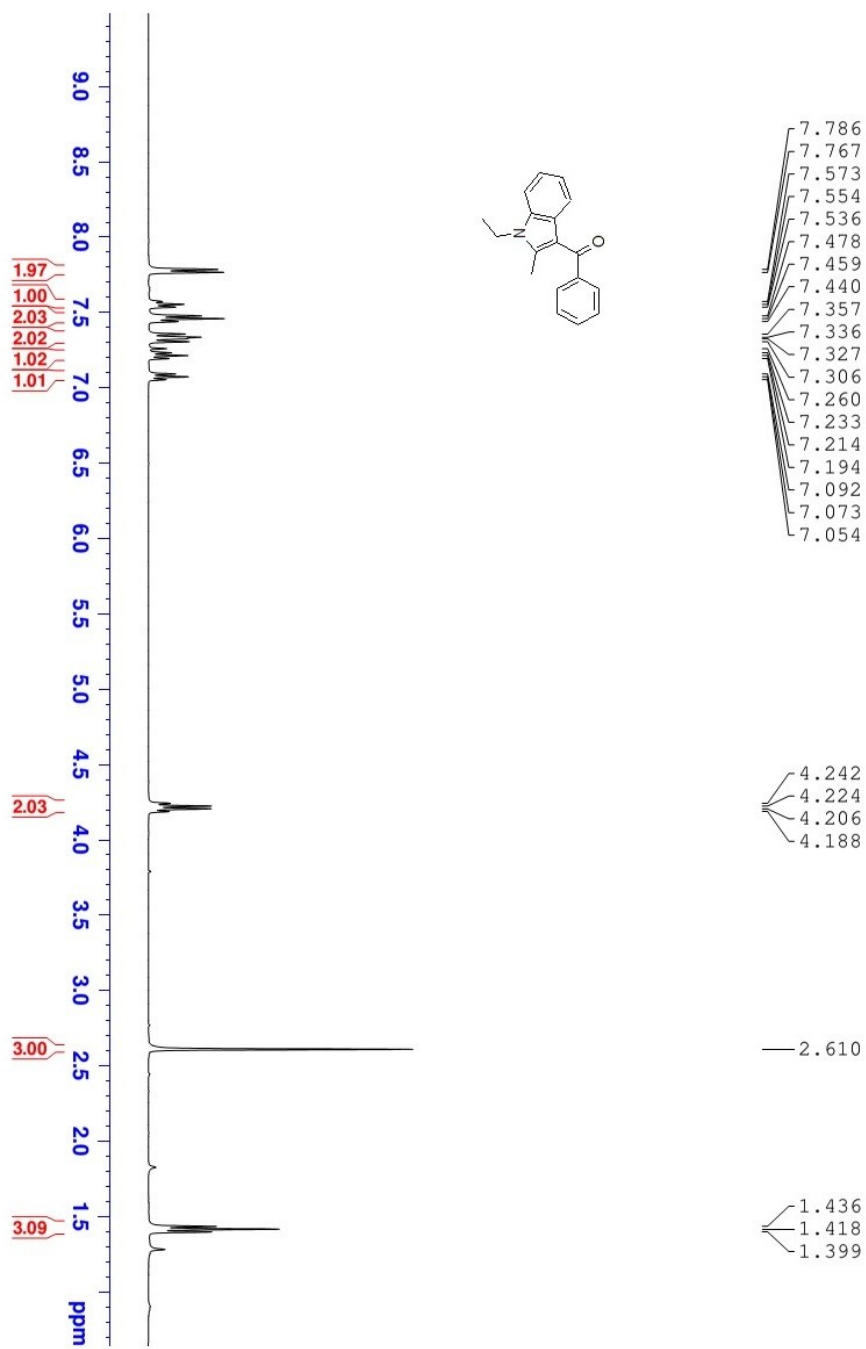

<sup>1</sup>H NMR of Compound 3ba

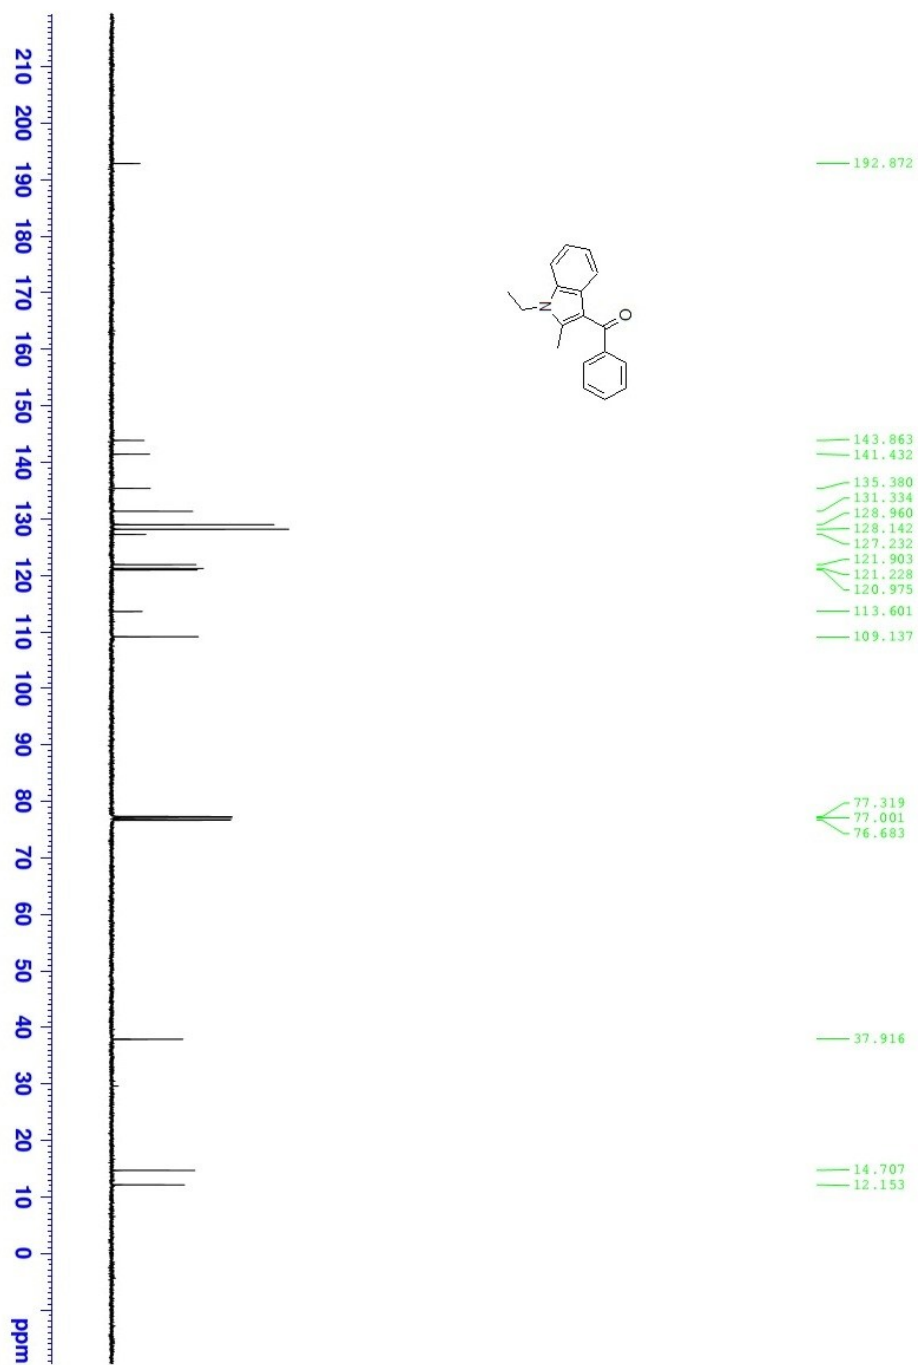

**<sup>13</sup>C NMR of Compound 3ba**

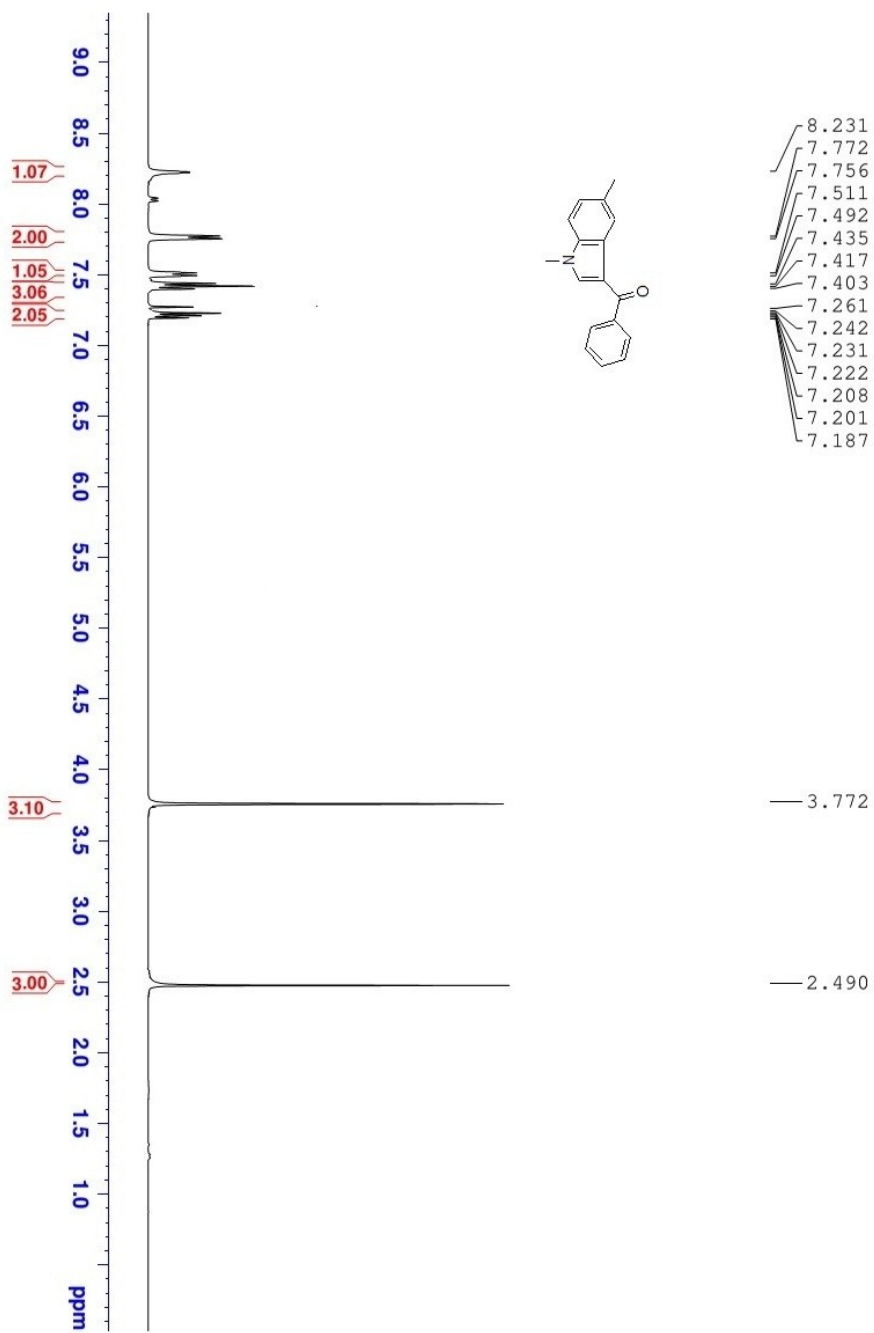

**<sup>1</sup>H NMR of Compound 3ca**

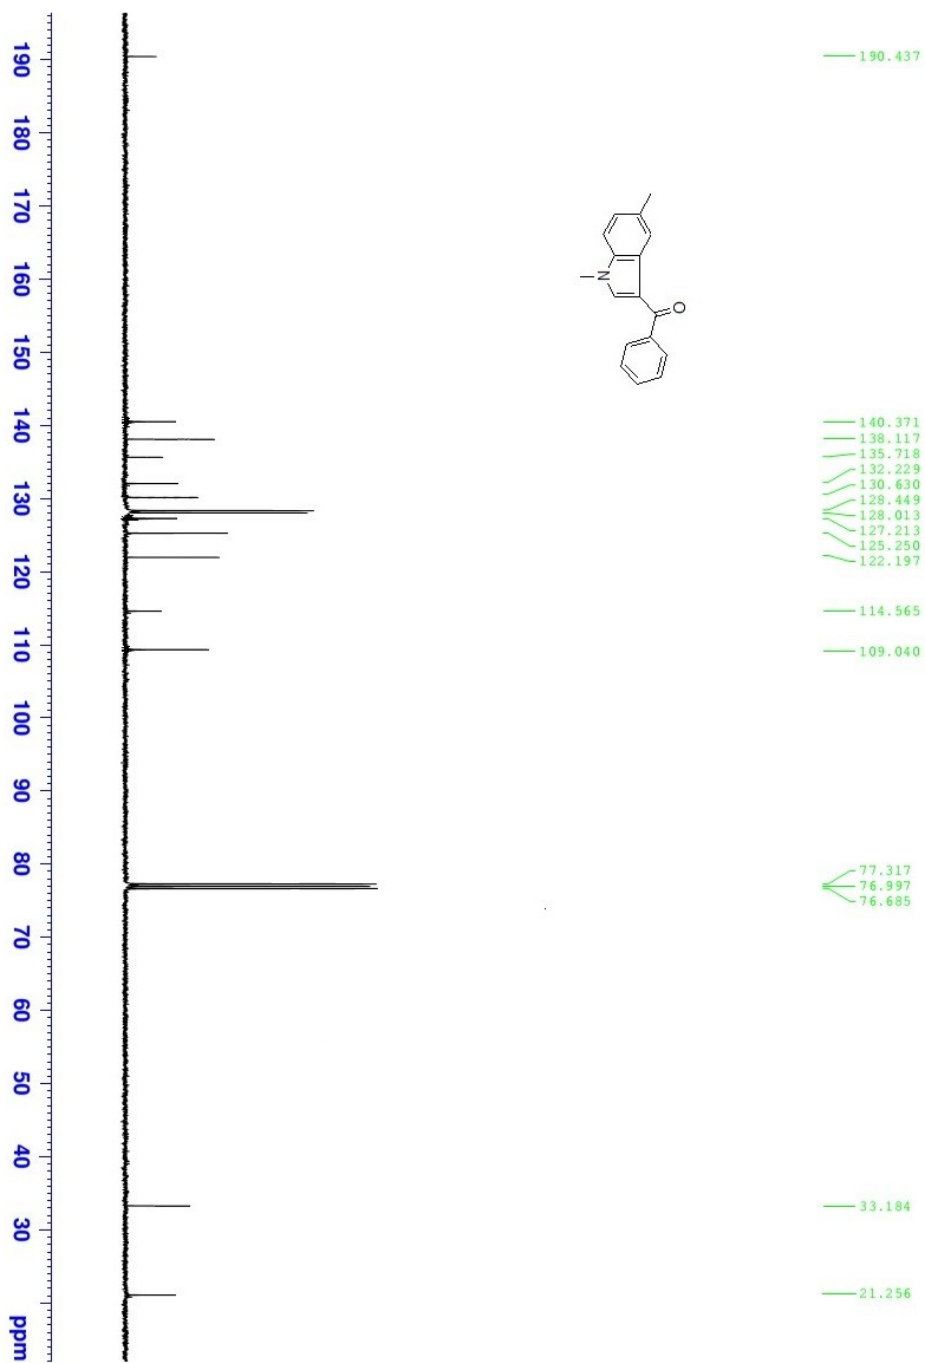

**<sup>13</sup>C NMR of Compound 3ca**

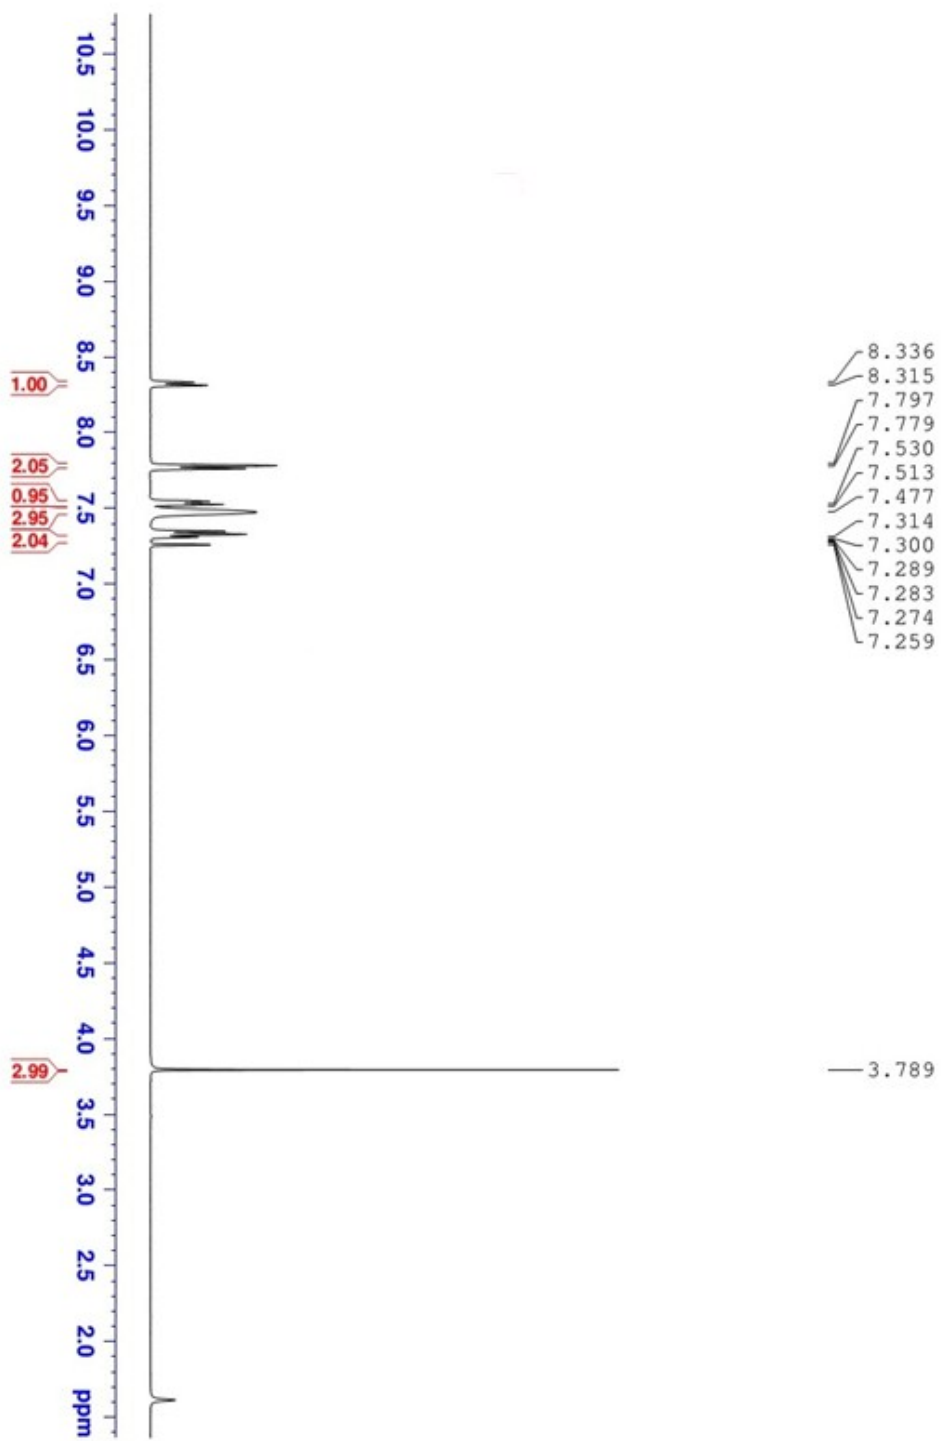

**<sup>1</sup>H NMR of Compound 3da**



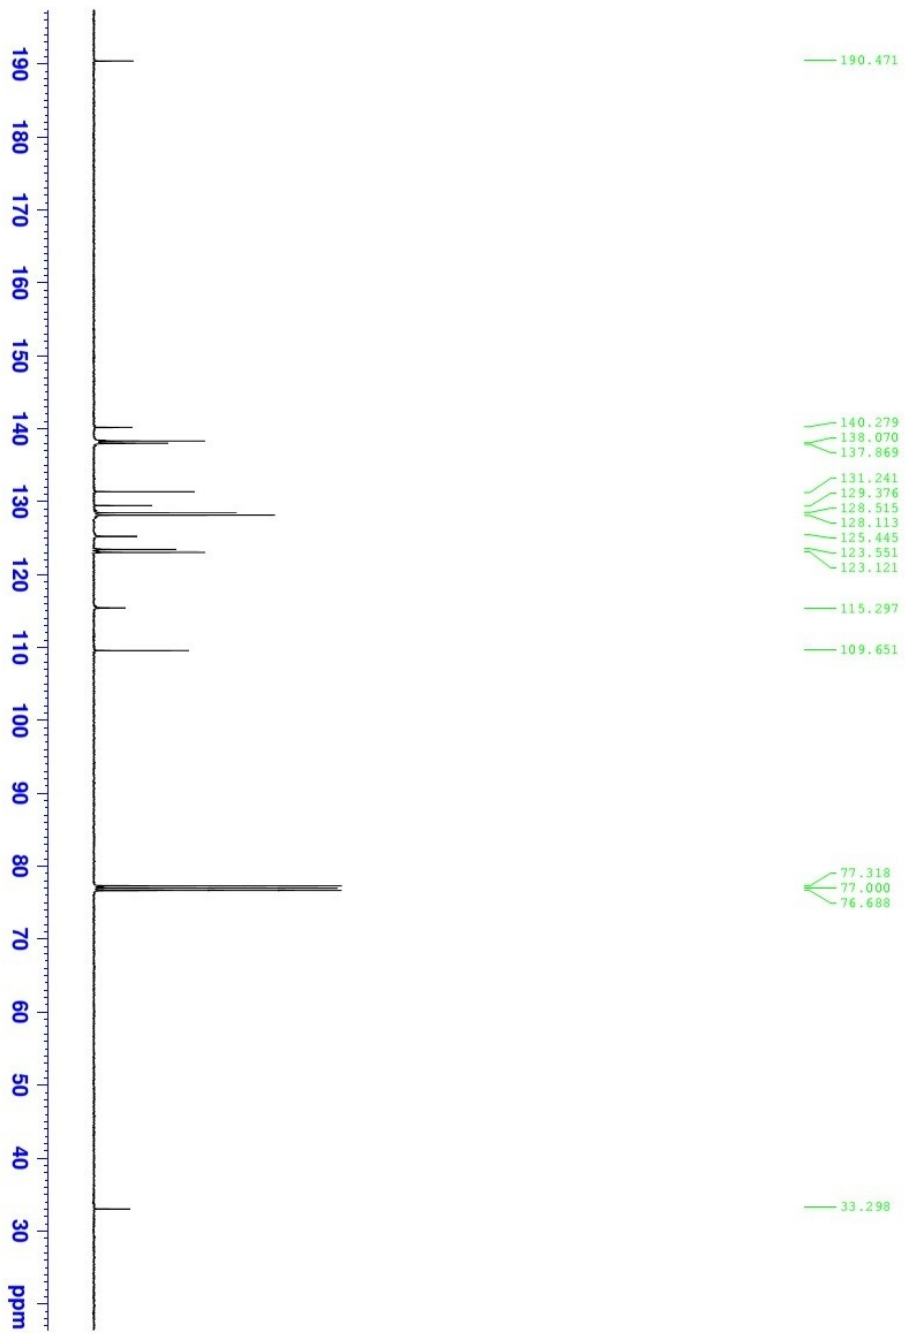

<sup>13</sup>C NMR of Compound 3da

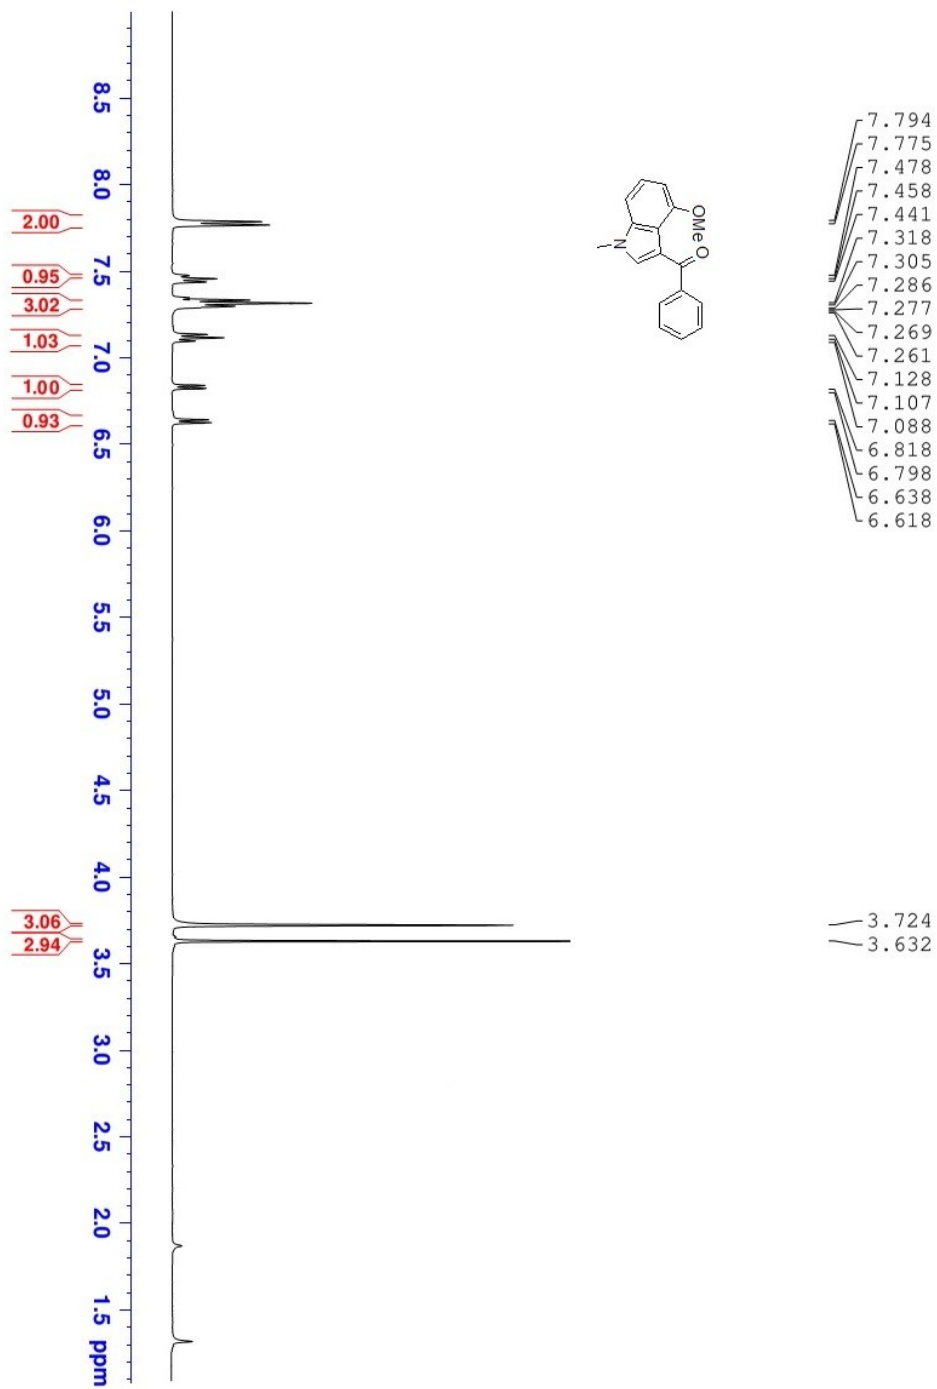

### <sup>1</sup>H NMR of Compound 3ea

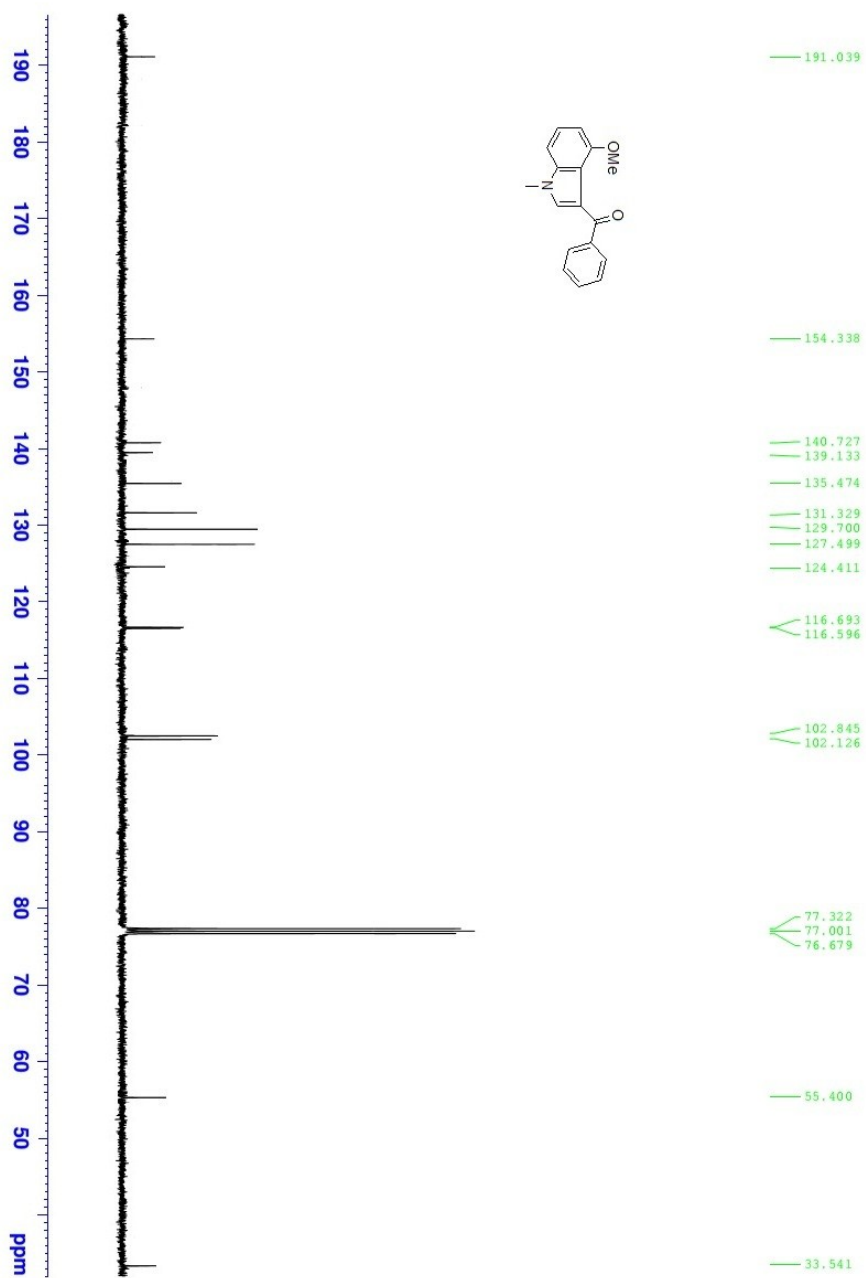

### <sup>13</sup>C NMR of Compound 3ea

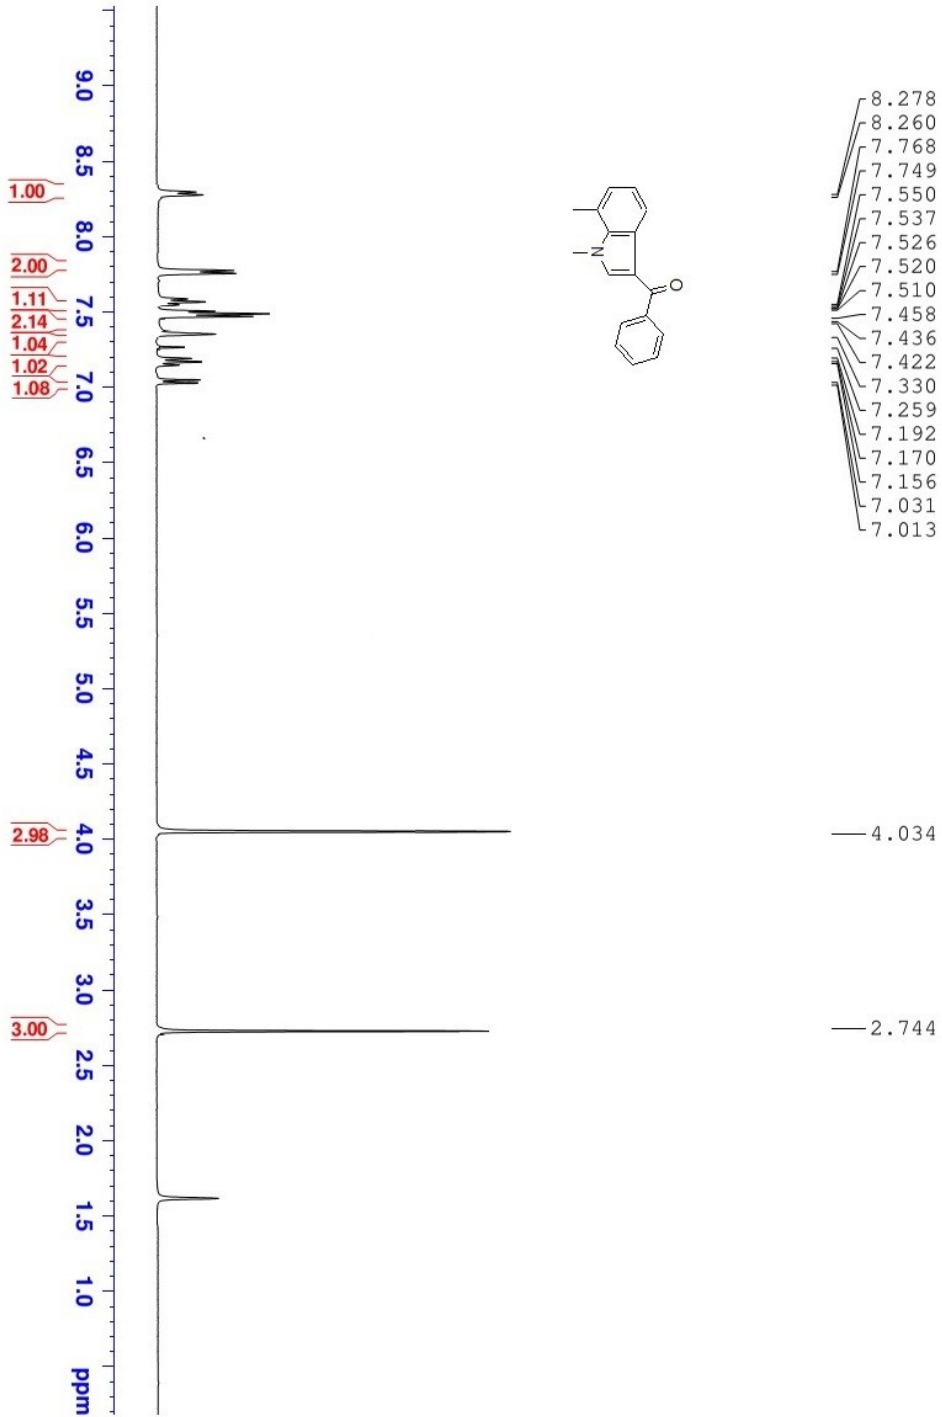

### <sup>1</sup>H NMR of Compound 3fa

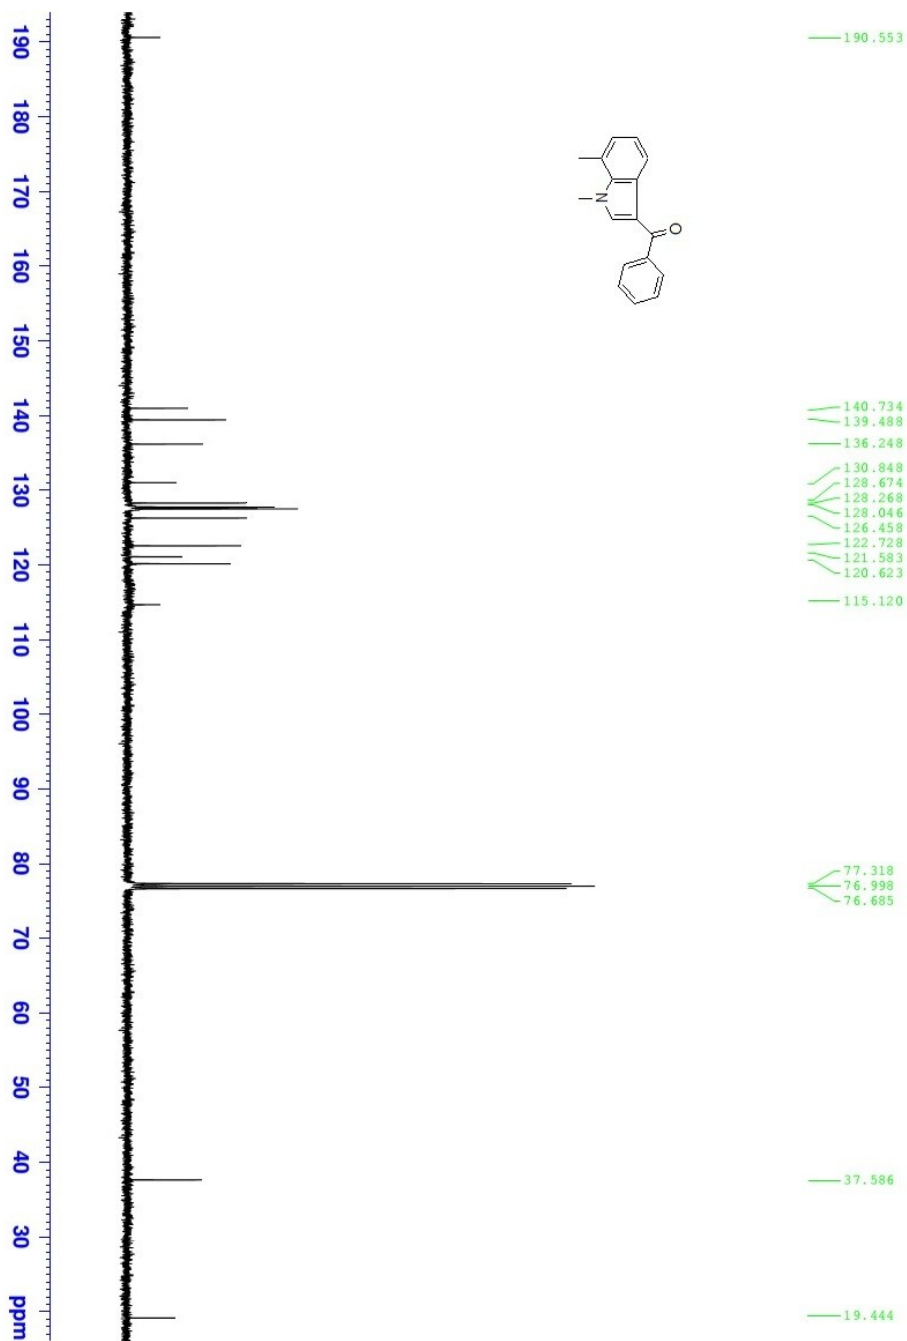

### <sup>13</sup>C NMR of Compound 3fa

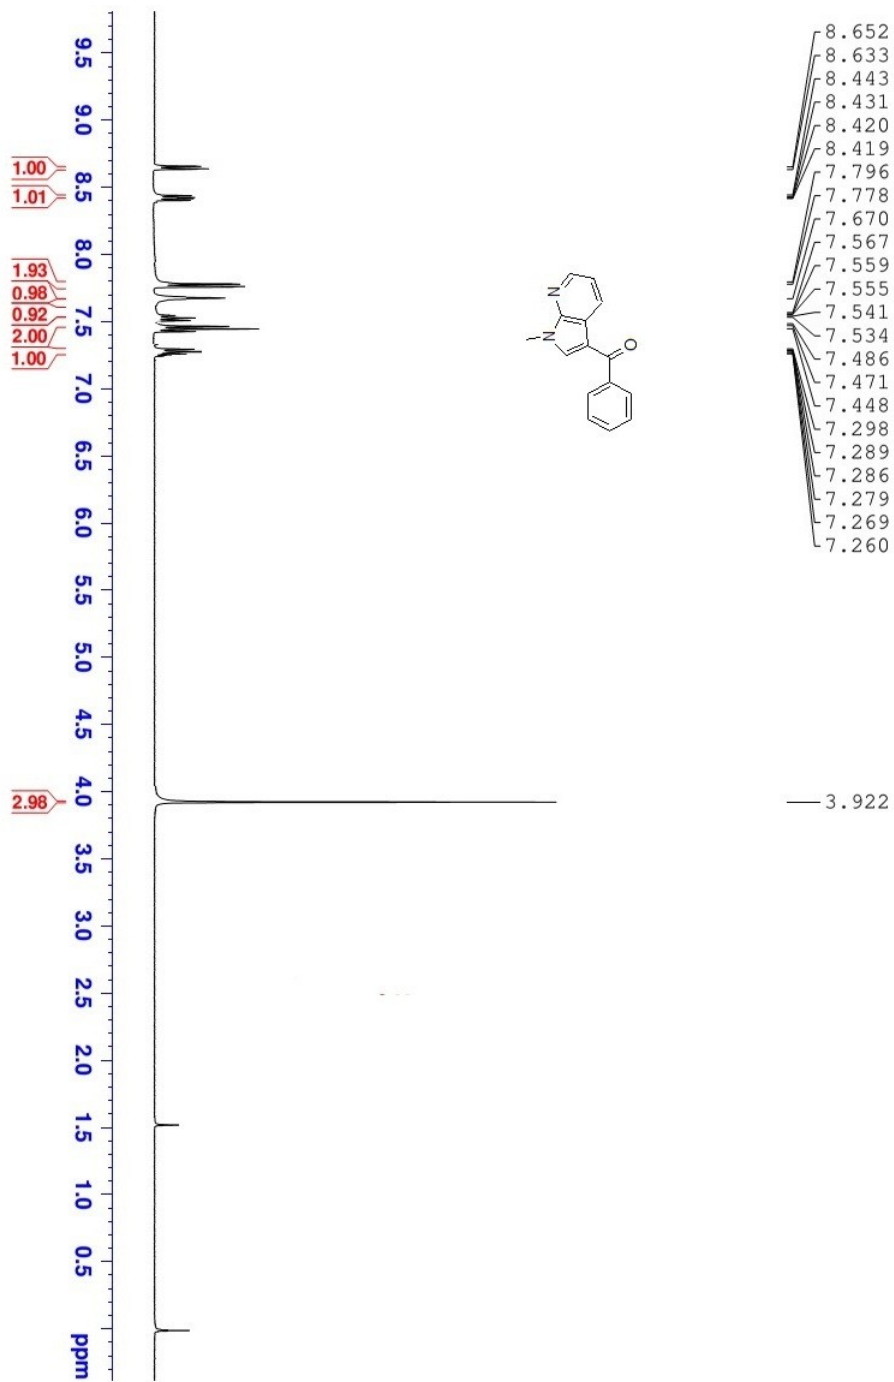

**<sup>1</sup>H NMR of Compound 3ga**

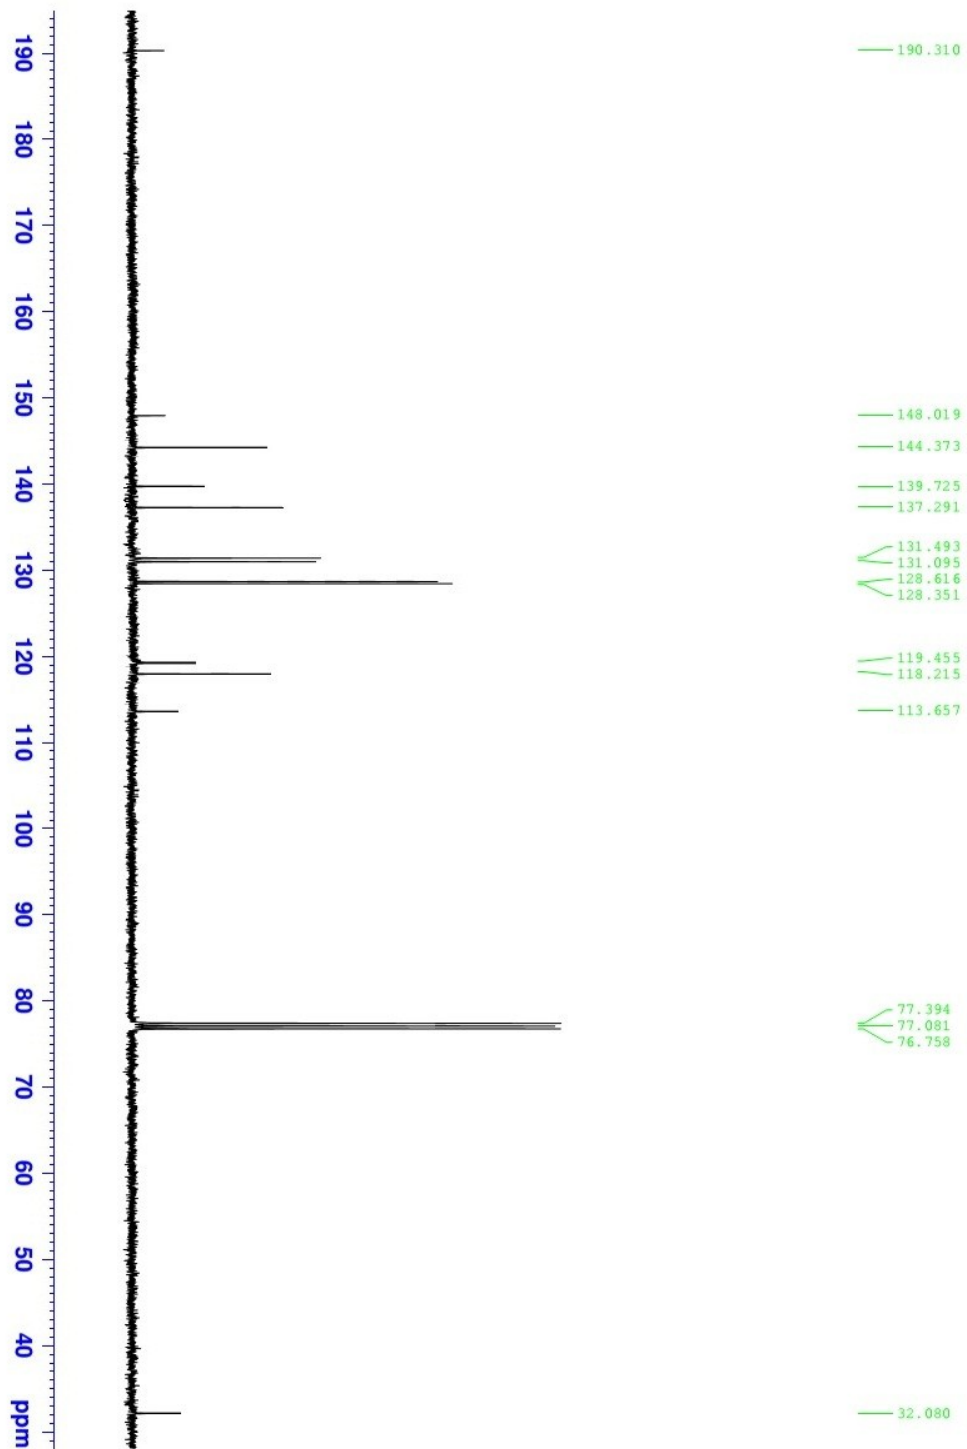

<sup>13</sup>C NMR of Compound 3ga

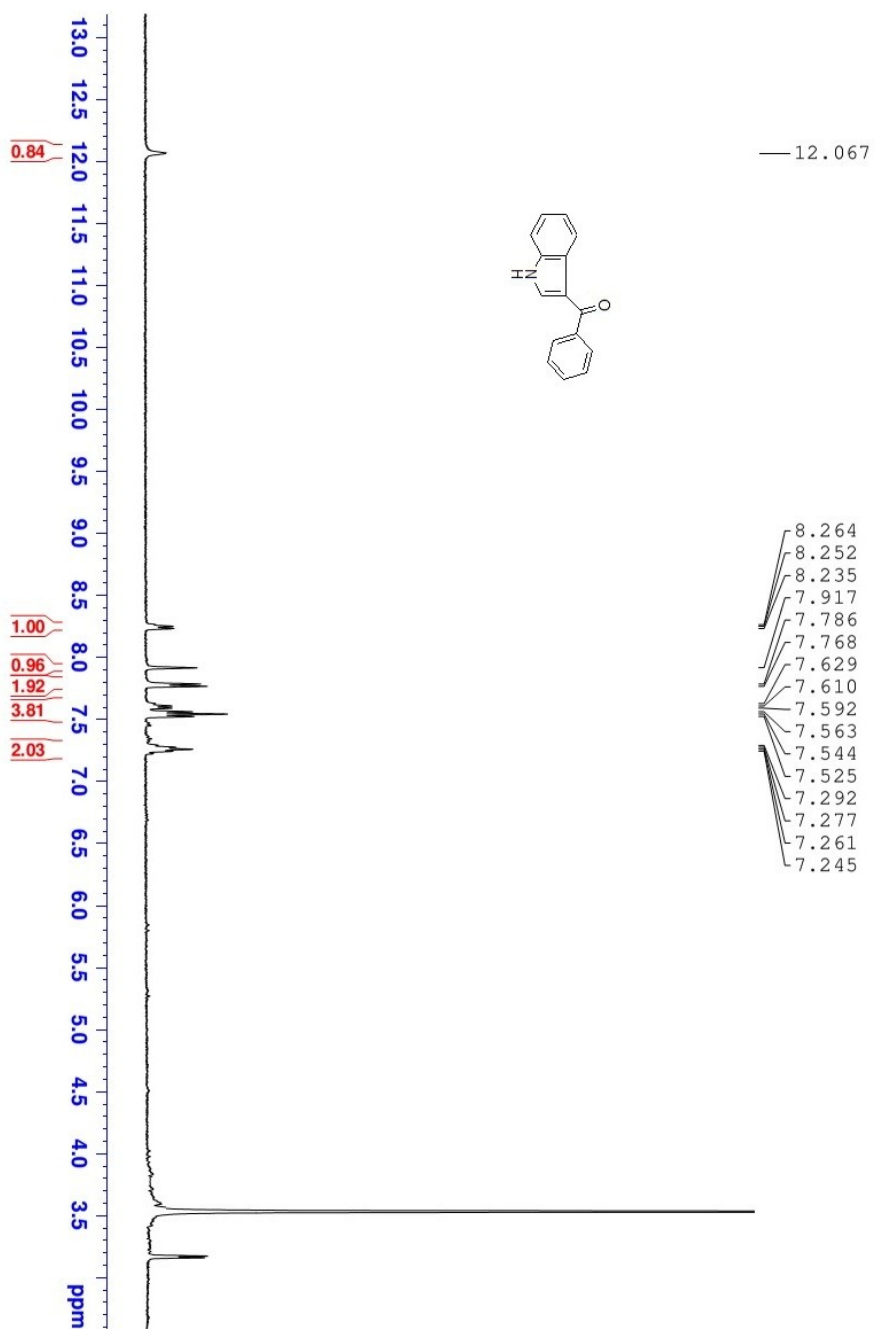

<sup>1</sup>H NMR of Compound 3ha



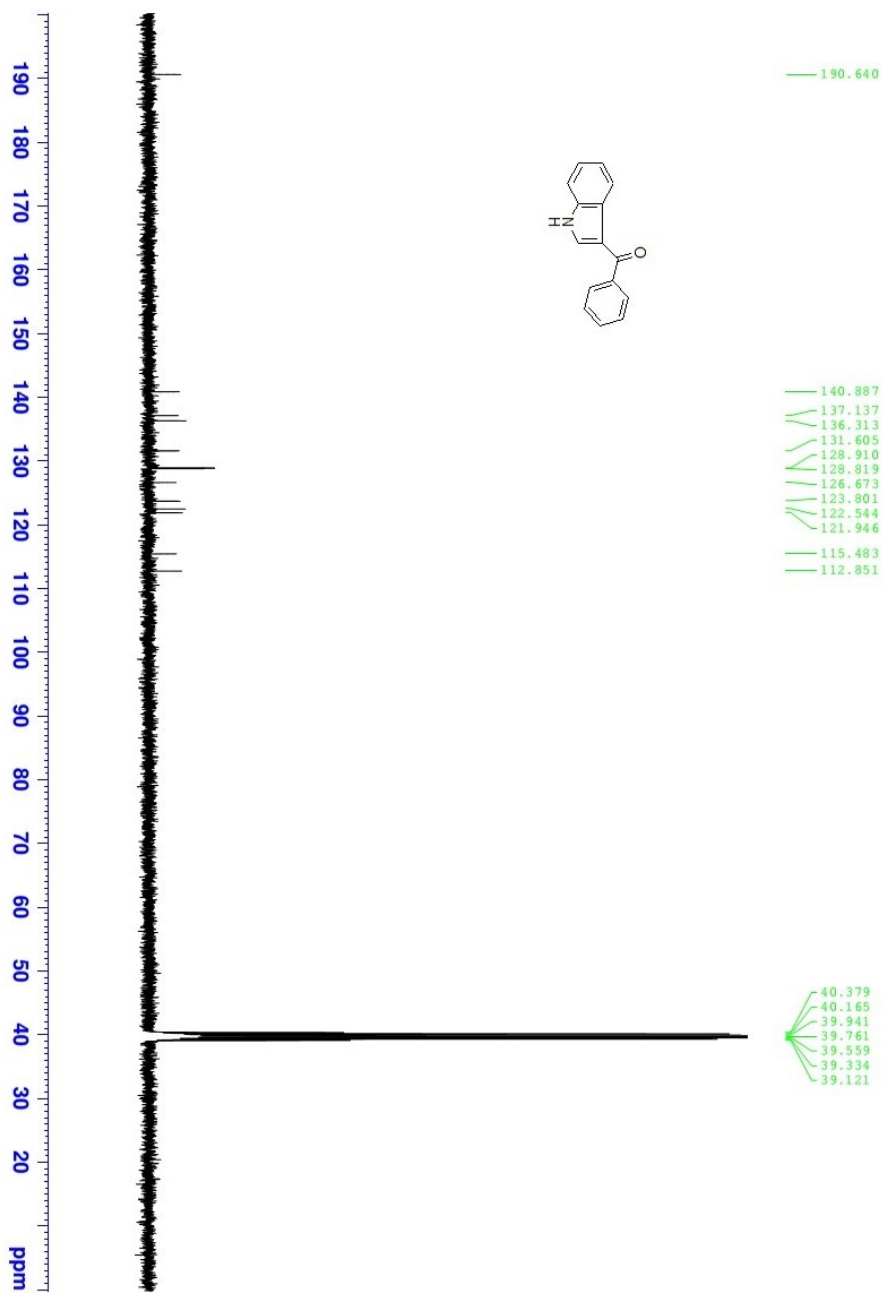

<sup>13</sup>C NMR of Compound 3ha

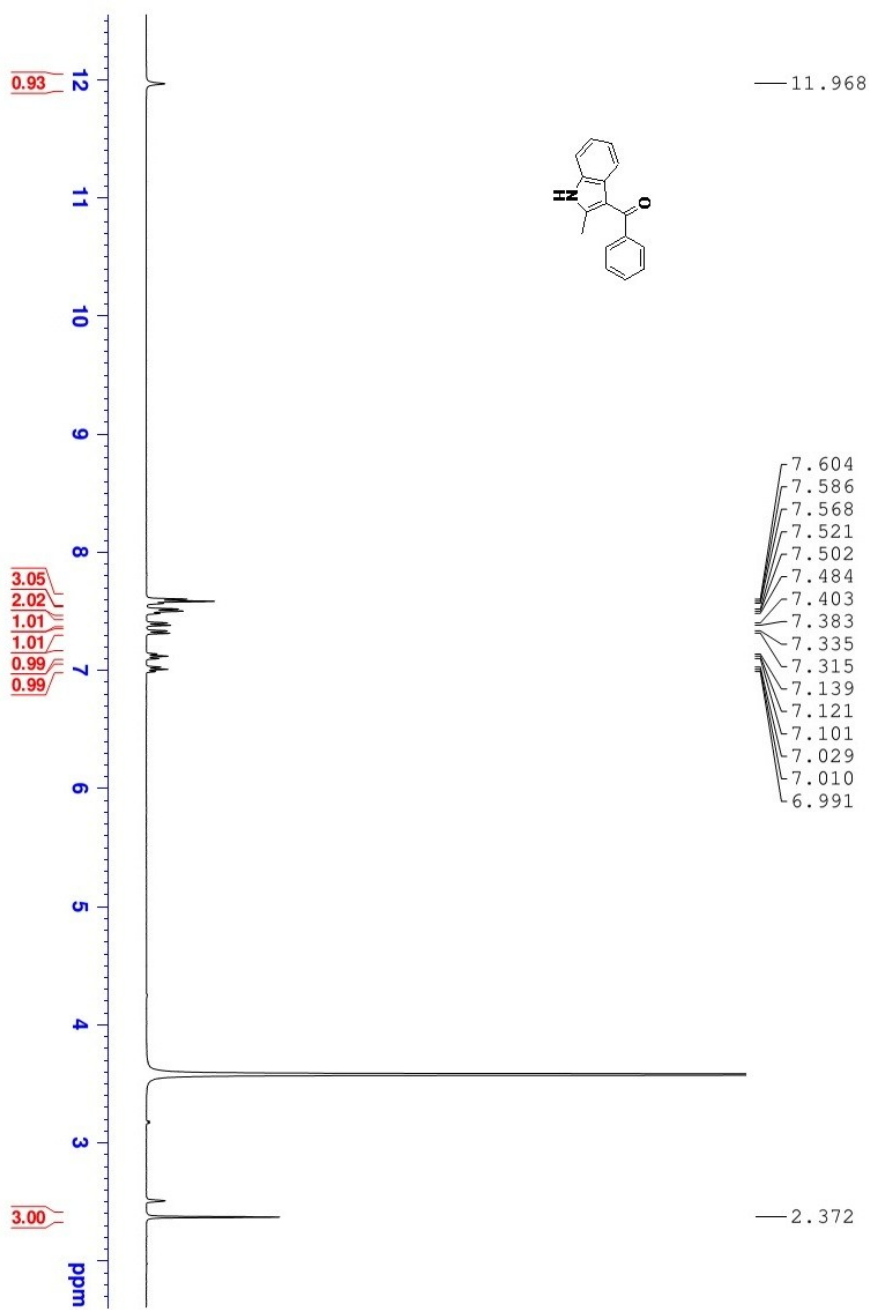

<sup>1</sup>H NMR of Compound 3ia

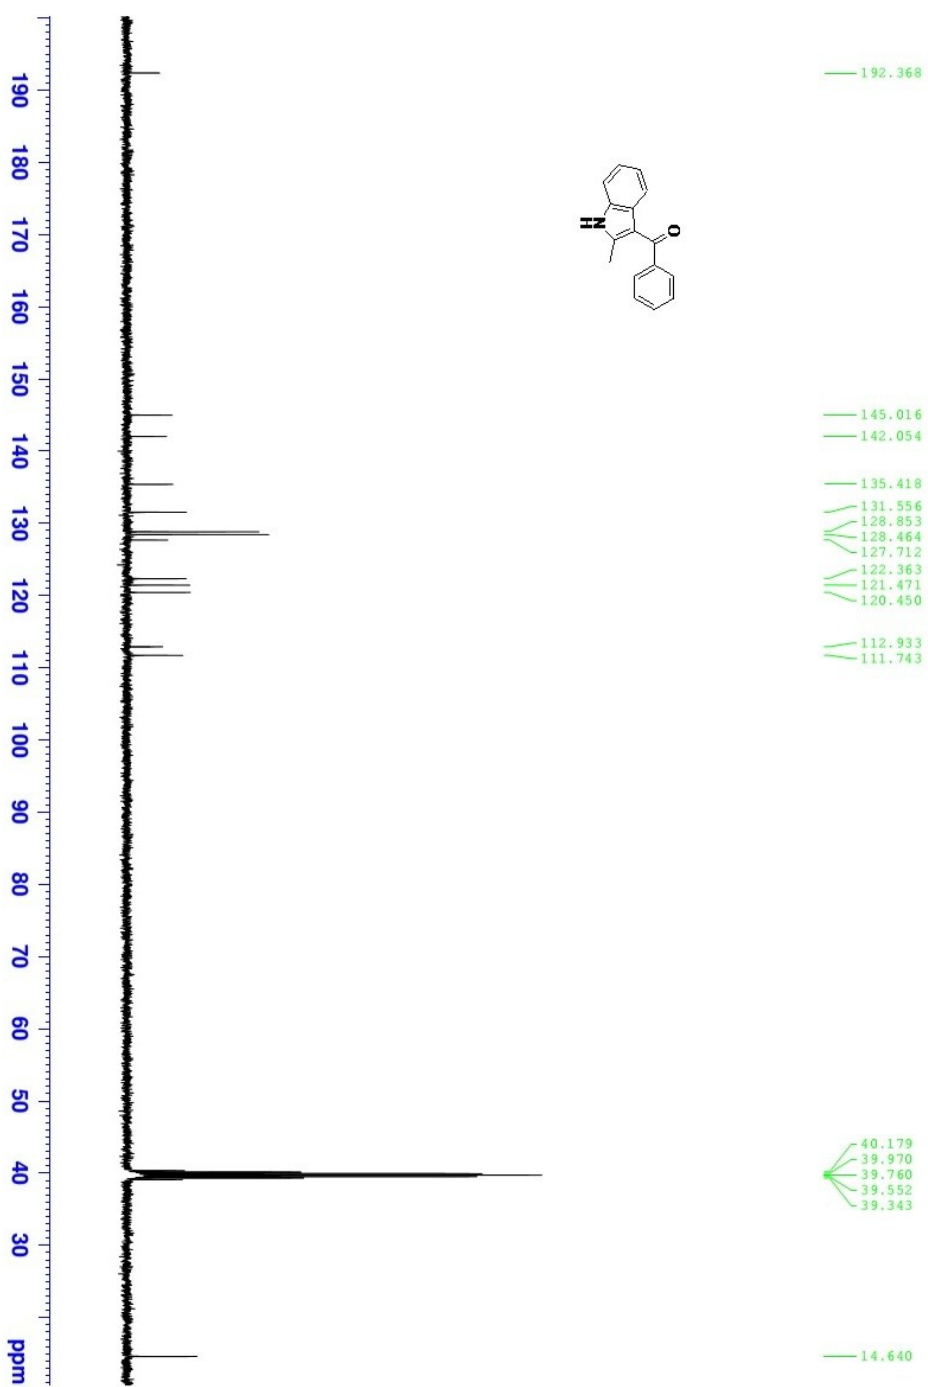

<sup>13</sup>C NMR of Compound 3ia

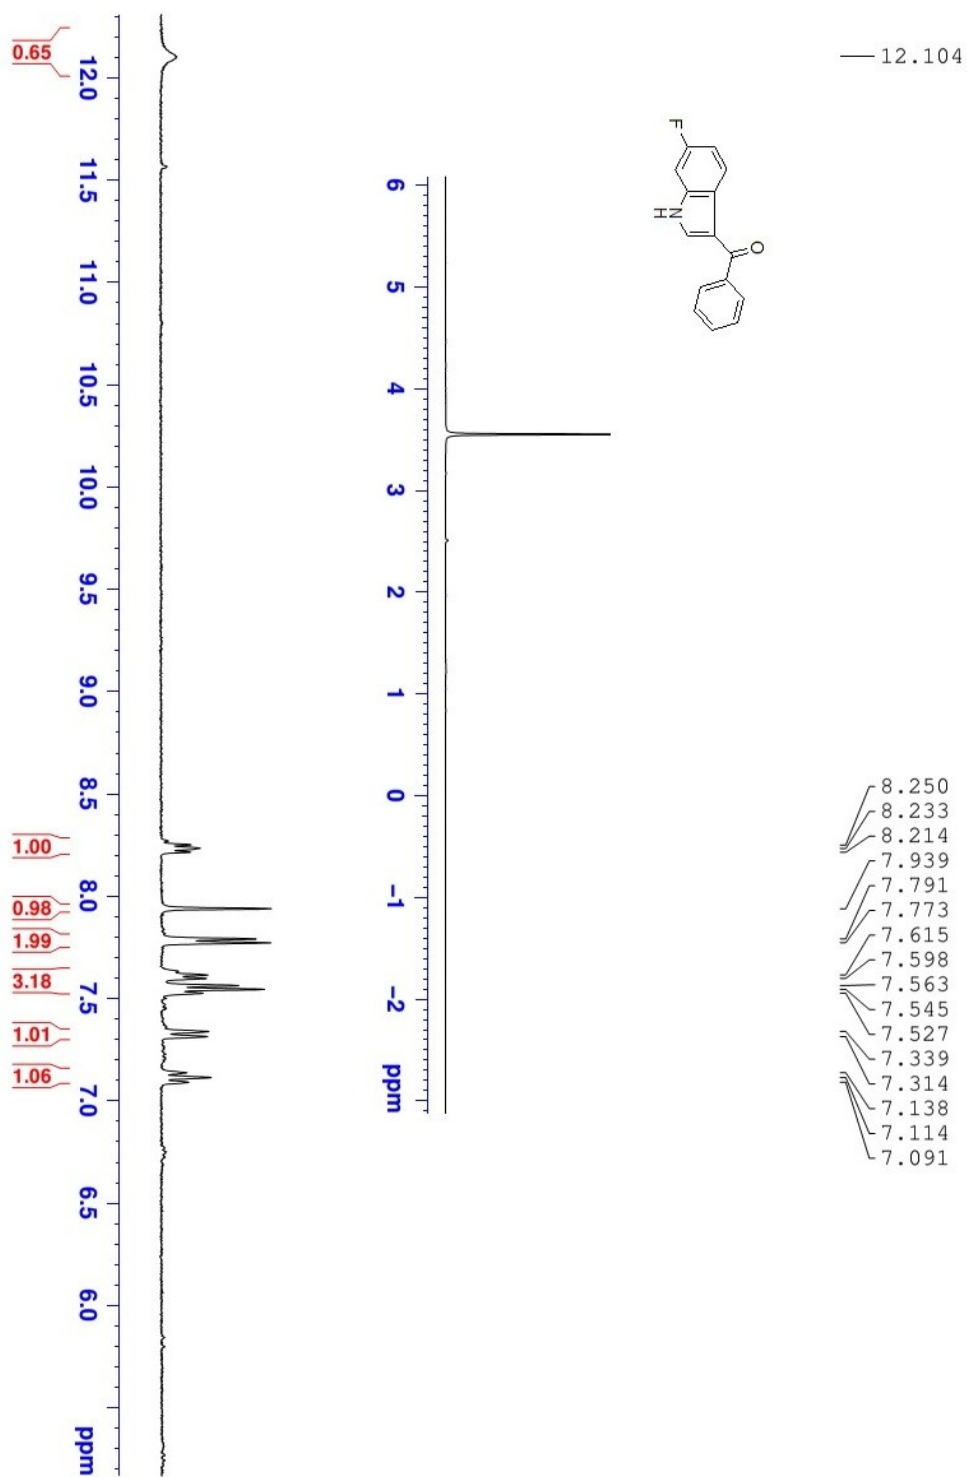

**<sup>1</sup>H NMR of Compound 3ja**

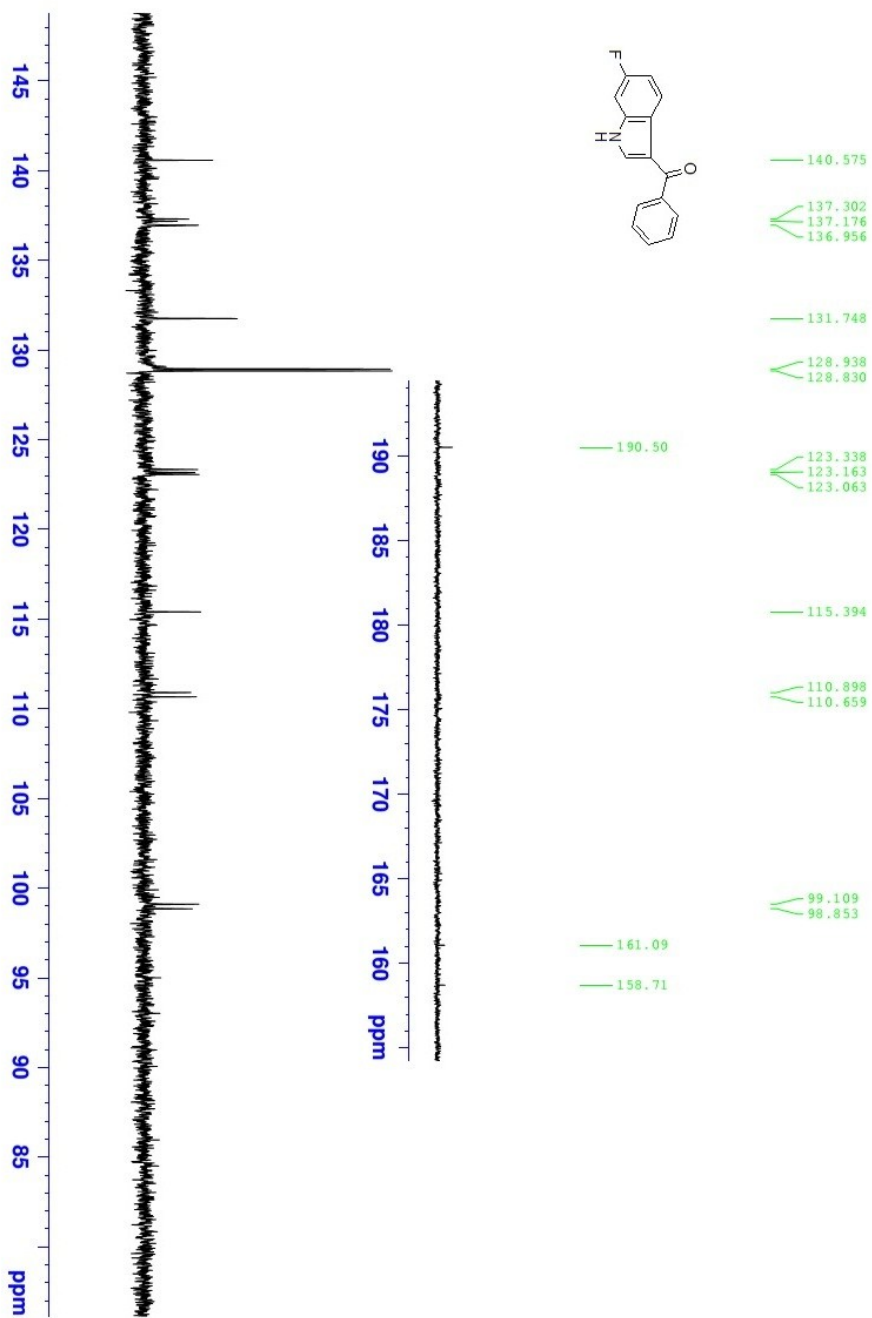

<sup>13</sup>C NMR of Compound 3ja
